# Supplementary material for: Position- and Hippo signaling-dependent plasticity during lineage segregation in the early mouse embryo
Source: eLife journal article supplement (doi:10.7554/elife.22906), 2017-02-22
Supplement: supp [file elife-22906-supp-v1.zip]

Archive with 13 entries (13 files):
- elife_poa_e22906_Figure_1_Figure_Supplement_1.pdf
- elife_poa_e22906_Figure_3_source_data_2.xlsx
- elife_poa_e22906_Figure_3_Figure_Supplement_2.pdf
- elife_poa_e22906_Video_1.mp4
- elife_poa_e22906_Figure_4_Figure_Supplement_1.pdf
- elife_poa_e22906_Figure_3_source_data_1.xlsx
- elife_poa_e22906_Figure_6_Figure_Supplement_2.pdf
- elife_poa_e22906_Video_3.mp4
- elife_poa_e22906_Figure_6_Figure_Supplement_1.pdf
- elife_poa_e22906_Figure_2_source_data_1.xlsx
- elife_poa_e22906_Figure_5_Figure_Supplement_1.pdf
- elife_poa_e22906_Figure_3_Figure_Supplement_1.pdf
- elife_poa_e22906_Video_2.mp4
