# Supplementary material for: Position- and Hippo signaling-dependent plasticity during lineage segregation in the early mouse embryo
Source: eLife journal article supplement (doi:10.7554/elife.22906), 2017-02-22
Supplement: supp [file elife-22906-supp-v1.zip › elife_poa_e22906_Figure_2_source_data_1.xlsx]

## Sheet: Sheet1
ealry 32-cell "Cdx2-low" vs "Cdx2-high" population
higher in "Cdx2-low" group	fold change (log)	Z-score	corrected Z-score
Upp1	-5.50218	-7.14473	-6.02144
Gjb5	-4.94314	-7.1447	-6.02144
Tdgf1	-4.20755	-7.14463	-6.02144
Etv5	-3.70735	-7.07466	-5.97877
Tat	-4.1487	-6.44596	-5.32037
Spic	-3.79562	-6.40188	-5.2779
Nupr1	-5.06083	-6.29424	-5.16791
Fgf4	-5.06083	-6.27343	-5.15197
Uhrf1	-3.29542	-6.20869	-5.09109
Tdh	-2.73638	-6.04532	-4.90126
Ly6e	-3.06004	-5.88362	-4.7344
Ggt1	-2.44214	-5.69415	-4.52186
Sox2	-4.20755	-5.65349	-4.47813
Nanog	-2.55984	-5.62625	-4.45084
Zfp57	-2.97177	-5.6115	-4.43891
Lamb1	-2.58926	-5.26869	-4.06048
Ppm1a	-2.3833	-5.22837	-4.02629
Prss35	-4.1487	-5.21702	-4.02543
Mgarp	-2.03022	-5.11899	-3.93675
Rnf130	-2.58926	-5.07805	-3.88875
Ppap2a	-2.41272	-4.85004	-3.62709
Slfn2	-4.35467	-4.84382	-3.62287
Gjb4	-3.6485	-4.80591	-3.58108
Rnd3	-2.79523	-4.73992	-3.50566
Jam2	-2.64811	-4.73885	-3.50566
Msh6	-1.94195	-4.61307	-3.36346
Porcn	-2.23618	-4.60227	-3.35259
Bambi	-2.91292	-4.58659	-3.33517
Pecam1	-2.53041	-4.58047	-3.33381
Mex3b	-3.08946	-4.57278	-3.32692
AA467197	-2.50099	-4.54589	-3.30092
Osr2	-2.7658	-4.5335	-3.28762
Inpp5d	-2.3833	-4.50354	-3.25079
Psrc1	-2.70695	-4.48655	-3.23121
Jak3	-2.79523	-4.44259	-3.17528
Sat1	-1.82425	-4.43019	-3.16797
Epha4	-2.58926	-4.40775	-3.14384
Tbx15	-2.53041	-4.39878	-3.13775
Gpcpd1	-1.8831	-4.25135	-2.9752
Hand1	-2.64811	-4.20688	-2.92264
Pdgfra	-3.11888	-4.11787	-2.81727
Pygb	-2.61868	-4.1001	-2.79776
Ckb	-1.55944	-4.07067	-2.76509
Ifi35	-1.97137	-4.05423	-2.75163
Tmem191c	-2.00079	-4.04481	-2.74093
Zyg11a	-2.32445	-4.03436	-2.7324
Ralb	-1.91252	-4.03341	-2.7324
1700003M07Rik	-3.53081	-4.03039	-2.7324
Pklr	-2.44214	-4.00012	-2.70072
Sparc	-2.08906	-3.95113	-2.64021
Foxh1	-2.55984	-3.95004	-2.64021
Tet1	-1.97137	-3.94927	-2.64021
Zfp36l1	-2.73638	-3.93304	-2.62558
Agtrap	-1.53002	-3.92569	-2.62096
Hmgn5	-1.97137	-3.91363	-2.608
Scd2	-1.82425	-3.90613	-2.59959
Hnf4a	-2.64811	-3.89385	-2.58437
Tubb5	-1.70656	-3.89037	-2.58164
Tns1	-2.17733	-3.82178	-2.49454
Glrx	-2.14791	-3.80902	-2.48273
Galnt11	-1.8831	-3.80561	-2.47998
Bin1	-2.2656	-3.79724	-2.47221
Mep1b	-2.05964	-3.79363	-2.46915
Klf2	-1.91252	-3.75744	-2.42012
St6galnac2	-1.94195	-3.7568	-2.42012
Creb3l2	-2.94234	-3.70269	-2.35282
Fam25c	-3.20715	-3.66684	-2.31172
Dram1	-2.35387	-3.63556	-2.27172
Dmtn	-1.97137	-3.63349	-2.27071
9030617O03Rik	-2.94234	-3.6123	-2.25059
Plk2	-4.11928	-3.60365	-2.24268
Glipr2	-2.00079	-3.57775	-2.21066
Tex19.2	-1.79483	-3.57548	-2.21066
Sgpl1	-1.64771	-3.56952	-2.20374
Plekhg5	-1.8831	-3.55487	-2.19157
Ssbp4	-1.97137	-3.54974	-2.18774
Add3	-1.8831	-3.53322	-2.16681
Zyg11b	-1.91252	-3.5262	-2.16007
Slc12a7	-1.67714	-3.49229	-2.11593
Plod1	-1.61829	-3.49152	-2.11593
Tmem106a	-1.91252	-3.48295	-2.10992
Gjb3	-1.73598	-3.45031	-2.07151
Jrk	-2.73638	-3.41373	-2.02664
Creg1	-1.41232	-3.39677	-2.00964
Rnd1	-2.55984	-3.39212	-2.00606
Nid1	-2.00079	-3.38767	-2.00278
Uchl1	-2.50099	-3.36899	-1.98001
Ccdc160	-1.94195	-3.3683	-1.98001
Rbpms2	-1.44175	-3.35661	-1.96894
higher in "Cdx2-high" group	fold change (log)	Z-score	corrected Z-score
Krt18	5.38449	7.14469	6.02144
Lrp2	5.11968	7.14469	6.02144
Krt8	4.1487	7.14469	6.02144
Akr1b8	3.7662	7.14469	6.02144
Dab2	4.06043	7.14469	6.02144
Fabp3	3.41312	7.10699	5.99622
Id2	3.91332	7.06435	5.97877
Dppa1	3.61908	7.01977	5.94069
Anxa2	4.03101	6.98778	5.91631
Neu1	3.266	6.6321	5.50831
Vtcn1	4.53121	6.54919	5.42148
Gsn	3.50139	6.49777	5.3715
Crb3	3.266	6.36223	5.24021
Cbs	3.73677	6.22952	5.1078
Mbp	4.76659	6.02484	4.88435
Cldn6	3.88389	5.96481	4.81888
S100a10	3.32485	5.90756	4.75639
Naga	3.20715	5.86341	4.71675
Lrrfip1	3.03061	5.69574	4.52186
Ap2a2	2.14791	5.5945	4.424
Slc15a2	3.85447	5.56283	4.39068
Cryab	3.17773	5.55091	4.38178
Eps8l2	3.11888	5.54389	4.37884
Kank1	3.67793	5.52235	4.35768
Mab21l3	5.00198	5.51596	4.35526
Vgll3	3.94274	5.31769	4.11165
Bmp8b	3.88389	5.31216	4.1102
Fam213a	2.64811	5.24705	4.03832
Epn3	3.97216	5.22725	4.02629
Gm2a	1.79483	5.22541	4.02629
Kremen2	2.85407	5.21978	4.02543
Anxa3	2.97177	5.18879	3.99433
Frmd4b	3.29542	5.17178	3.98257
Dapk1	4.03101	5.16808	3.98257
Tacstd2	3.44254	5.16703	3.98257
Tjp2	2.29503	5.16436	3.98257
Gata3	2.47157	5.16175	3.98257
S100a11	2.58926	5.14308	3.96315
Ddah1	2.35387	5.05904	3.86861
Tmprss2	5.38449	4.98606	3.77908
Patl2	3.20715	4.9592	3.74857
Pwwp2b	2.97177	4.95229	3.74703
Stard4	3.11888	4.95173	3.74703
Trp53bp2	2.64811	4.86697	3.6412
Ube2h	2.23618	4.86147	3.63803
Dusp4	3.82505	4.82831	3.60651
AU021092	2.55984	4.77494	3.54435
Nek6	2.2656	4.73696	3.50566
Serpinb9b	2.55984	4.7306	3.50093
Ank	2.73638	4.67856	3.43602
Bmyc	2.08906	4.66782	3.42541
Clic3	2.41272	4.63637	3.38733
Fam213b	2.53041	4.63215	3.38528
Upk1a	3.35427	4.58155	3.33381
Efhd2	2.3833	4.55094	3.30114
Pdzk1ip1	2.79523	4.54762	3.30092
Epas1	2.05964	4.43764	3.17177
Cish	2.47157	4.43228	3.16797
Lgals4	2.53041	4.41828	3.15499
D630045M09Rik	2.03022	4.40173	3.13874
Lurap1l	3.70735	4.38285	3.12076
Camk1	2.14791	4.38181	3.12076
Trap1a	2.35387	4.35309	3.0848
Iffo2	2.82465	4.33869	3.07069
Ggta1	2.50099	4.33786	3.07069
Dnmbp	2.44214	4.33627	3.07069
Trpm6	3.29542	4.32734	3.06324
Tinagl1	2.3833	4.32296	3.06324
Tjp3	2.53041	4.32274	3.06324
Rab17	2.67753	4.32247	3.06324
Creld1	3.35427	4.28516	3.01526
Fgd3	3.50139	4.26447	2.98978
Park2	3.20715	4.24979	2.9752
Cdx2	2.03022	4.21286	2.92723
Abcb1a	2.47157	4.20557	2.92264
Fuca2	2.11849	4.20234	2.9209
Lctl	2.14791	4.19468	2.91303
Myo1c	2.11849	4.1873	2.90552
Grhl1	2.67753	4.13017	2.82906
Ugp2	1.94195	4.12519	2.82481
Endod1	3.97216	4.11479	2.81563
Cnn2	2.08906	4.08634	2.78117
Cystm1	1.58886	4.08272	2.77872
Sdc4	1.61829	4.06929	2.76509
Cldn4	1.61829	4.06655	2.76381
Cct6b	2.11849	4.06338	2.76192
Slc9a3r1	2.79523	4.03098	2.7324
Tspan8	2.32445	4.02993	2.7324
Actn4	1.3829	4.02132	2.72275
Pdzk1	3.17773	4.01817	2.72073
Wnt7b	2.23618	4.01022	2.71196
Tbc1d10c	3.23658	3.99884	2.70072
Dusp3	1.97137	3.97607	2.67104
Cyp2s1	1.55944	3.94213	2.63325
Myo5b	2.17733	3.94107	2.63325
Ndrg1	5.17852	3.93146	2.62558
Slc52a3	2.82465	3.9308	2.62558
Arhgap32	2.73638	3.92436	2.62096
Slc5a11	2.11849	3.8798	2.56879
Rnf122	2.3833	3.87772	2.56804
Mid1ip1	3.11888	3.86145	2.54702
Hk2	1.94195	3.83303	2.5085
Irf6	2.58926	3.81612	2.48859
Efemp1	3.38369	3.81038	2.48273
Trim2	2.8835	3.8014	2.47607
Tnfrsf9	4.59005	3.73545	2.39118
Slc4a11	1.82425	3.72674	2.38061
Parva	2.97177	3.71198	2.36326
Myh10	1.76541	3.71196	2.36326
Igf2bp3	1.58886	3.70193	2.35282
Flot2	1.76541	3.6941	2.34494
Slc34a2	1.64771	3.69369	2.34494
Ccnl1	1.85368	3.68251	2.3306
Mgl2	1.76541	3.67821	2.32638
Acy3	2.05964	3.6392	2.27294
Atp1b1	1.76541	3.63599	2.27172
Txndc16	1.91252	3.62387	2.2585
Rin3	2.97177	3.61941	2.25394
Acsl6	2.44214	3.61359	2.25059
Ccdc42	2.8835	3.61221	2.25059
Snx24	2.85407	3.61168	2.25059
Slc22a20	3.06004	3.60896	2.24857
Pld6	2.41272	3.59538	2.23318
Cdc42ep5	1.85368	3.59458	2.23318
Ppargc1b	2.2656	3.57548	2.21066
Tbc1d2b	2.85407	3.56763	2.20287
Lrrc8e	2.85407	3.56397	2.20223
Tmem9	1.67714	3.56393	2.20223
Chmp2b	1.61829	3.5633	2.20223
Wipf1	2.29503	3.55186	2.18899
Ccdc69	2.79523	3.5397	2.17462
Cmip	1.94195	3.5277	2.16043
E2f8	2.23618	3.51867	2.15066
Chn2	2.17733	3.49094	2.11593
Kbtbd13	2.14791	3.49063	2.11593
Slc6a14	2.11849	3.48885	2.11511
Peak1	1.85368	3.4842	2.10995
Tmod1	2.2656	3.4748	2.09946
Arid5a	2.3833	3.47169	2.0971
Tsc22d4	1.64771	3.4708	2.0971
Gyltl1b	2.20676	3.46928	2.09662
Lgals7	2.47157	3.46194	2.08734
Sh3tc2	1.85368	3.44622	2.06712
Arhgdib	2.20676	3.44361	2.06497
Vgll1	2.47157	3.43471	2.05324
Tpm1	1.35348	3.43215	2.05116
Krt7	3.14831	3.4176	2.03075
Gas7	3.03061	3.41181	2.02551
2016-09-06	2.70695	3.40558	2.01776
Gpr4	2.05964	3.39975	2.01099
Kcnv2	2.91292	3.39881	2.01099
Hsd17b6	2.14791	3.3933	2.0061
Aktip	1.58886	3.39047	2.0053
Dkkl1	1.76541	3.3746	1.98445
G3bp2	1.23578	3.37085	1.98043
Mapkapk3	1.82425	3.36088	1.97121
Oas1f	4.08986	3.35949	1.97121
Tnfrsf12a	1.82425	3.3592	1.97121
Mtus1	1.8831	3.35445	1.96734
Wnk2	2.14791	3.34957	1.96153
Fbxw20	2.67753	3.34708	1.9594
Cyp4f39	2.50099	3.34445	1.95705
