# Supplementary material for: Position- and Hippo signaling-dependent plasticity during lineage segregation in the early mouse embryo
Source: eLife journal article supplement (doi:10.7554/elife.22906), 2017-02-22
Supplement: supp [file elife-22906-supp-v1.zip › elife_poa_e22906_Figure_3_source_data_1.xlsx]

## Sheet: 16-cell ICM vs TE
16-cell ICM vs TE
higher in ICM	fold change (log)	Z-score	corrected Z-score
Hand1	2.78505	5.59246	4.22073
Rhox5	4.6108	5.56306	4.20865
Pdgfra	4.08474	5.14206	3.68641
Epha4	3.0945	4.7053	3.12217
Spic	2.84694	4.51304	2.87365
Anpep	2.35182	4.33692	2.64946
Gjb5	2.44465	4.31972	2.63311
Tmem253	2.32087	4.22432	2.50463
Ptpn11	2.01142	3.9427	2.14129
Cenpb	2.84694	3.92858	2.13478
Pald1	2.41371	3.89774	2.09725
Rnf130	1.91859	3.89628	2.09725
Xist	3.28017	3.81218	1.97866
higher in TE	fold change (log)	Z-score	corrected Z-score
Dppa1	-4.85836	-7.14473	-5.83017
Id2	-5.94144	-7.14473	-5.83017
Lrp2	-4.9512	-7.14466	-5.83017
Dab2	-3.18733	-6.73935	-5.38304
Trp53bp2	-3.31111	-6.4542	-5.06865
Akr1b8	-3.18733	-6.41067	-5.04879
Anxa2	-3.34206	-6.30829	-4.95
Dusp4	-3.74434	-6.23419	-4.88292
Serpinb9b	-3.21828	-5.94621	-4.54041
Lrrfip1	-3.06355	-5.88709	-4.51072
Krt18	-3.373	-5.87878	-4.51072
Anxa3	-3.06355	-5.8757	-4.51072
Gsn	-3.43489	-5.78576	-4.41238
Fabp3	-2.84694	-5.66582	-4.27348
Fam213a	-3.24922	-5.61631	-4.2245
Ptges	-3.21828	-5.58896	-4.22073
Krt8	-2.81599	-5.58179	-4.22073
Tjp2	-2.50654	-5.26644	-3.83017
Nid2	-3.06355	-5.16516	-3.7059
Rab17	-2.84694	-5.10013	-3.64086
Bmyc	-2.53749	-4.96086	-3.46087
Neu1	-2.38276	-4.77323	-3.20829
Frmd4b	-2.50654	-4.67711	-3.09313
Sdc4	-2.84694	-4.67001	-3.09313
Capn2	-3.18733	-4.47284	-2.82437
Cryab	-2.63032	-4.42729	-2.7664
S100a10	-2.38276	-4.35385	-2.66508
D630045M09Rik	-2.10426	-4.26144	-2.55281
Cdx2	-2.16615	-4.17525	-2.44418
Kremen2	-2.1352	-4.17375	-2.44418
S100a11	-2.04237	-4.13998	-2.39992
Atp1b1	-2.04237	-4.09374	-2.34423
Slc9a3r1	-2.1352	-4.09369	-2.34423
Hapln4	-2.53749	-4.05556	-2.29163
Cldn6	-2.25898	-4.03921	-2.27401
Mgl2	-1.98048	-4.02247	-2.25885
Ube2h	-1.94953	-4.01922	-2.25885
Pde4dip	-2.32087	-3.93561	-2.13807
AU021092	-2.32087	-3.88768	-2.09087
Acot2	-1.98048	-3.85767	-2.04826
Ap2a2	-1.60914	-3.80372	-1.9783
Akr1c14	-2.22804	-3.80281	-1.9783

## Sheet: 16-cell ICM vs CO
16-cell ICM vs CO
higher in ICM	fold change (log)	Z-score	corrected Z-score
Hnf4a	-3.06355	-4.56783	-2.00121
higher in CO	fold change (log)	Z-score	corrected Z-score
Id2	3.31111	6.18579	4.38918

## Sheet: 16-cell TE vs CO
16-cell TE vs CO
higher in TE	fold change (log)	Z-score	corrected Z-score
Dppa1	-3.18733	-6.41535	-4.70115
Lrrfip1	-2.41371	-5.68082	-3.93768
Lrp2	-2.72316	-5.17523	-3.27735
Id2	-2.63032	-4.43906	-2.20111
higher in CO	fold change (log)	Z-score	corrected Z-score
Xist	3.31111	5.7508	3.93914
Rhox5	3.40395	4.57285	2.37145

## Sheet: early 32-cell ICM vs TE
early 32-cell ICM vs TE
higher in ICM	fold change (log)	Z-score	corrected Z-score
Upp1	-5.5701	-7.1447	-6.00515
Gjb5	-4.85836	-7.14466	-6.00515
Tdgf1	-4.23946	-7.14416	-6.00515
Etv5	-3.62056	-6.77468	-5.63349
Uhrf1	-3.373	-6.72484	-5.58687
Spic	-3.89907	-6.71198	-5.58353
Nupr1	-4.92025	-6.43046	-5.28855
Fgf4	-5.01309	-6.112	-4.92972
Ggt1	-2.59938	-6.04372	-4.86313
Ly6e	-3.00166	-5.88322	-4.68138
Ppm1a	-2.59938	-5.77611	-4.55601
Zfp57	-3.00166	-5.46747	-4.20363
Nanog	-2.7541	-5.34619	-4.08173
Psrc1	-2.78505	-5.28249	-4.01812
Tdh	-2.63032	-5.16922	-3.889
Tat	-4.05379	-5.06536	-3.76464
Ppap2a	-2.44465	-4.83289	-3.52269
Bambi	-2.97072	-4.76682	-3.44791
Mgarp	-2.01142	-4.72401	-3.3992
Epha4	-2.69221	-4.70916	-3.38352
Lamb1	-2.59938	-4.68662	-3.3574
Slfn2	-4.11568	-4.67725	-3.34897
Sat1	-2.07331	-4.63141	-3.29932
Sox2	-4.05379	-4.61645	-3.28707
Hand1	-2.66127	-4.61297	-3.28629
Inpp5d	-2.50654	-4.59989	-3.27629
Rnf130	-2.56843	-4.53253	-3.19218
Rnd3	-2.97072	-4.4884	-3.15048
Pecam1	-2.72316	-4.45851	-3.12267
Jam2	-2.56843	-4.45692	-3.12267
AA467197	-2.41371	-4.45548	-3.12267
Gjb3	-2.01142	-4.3212	-2.95028
Jak3	-2.90883	-4.30136	-2.92928
Gjb4	-3.46584	-4.29409	-2.92244
Prss35	-4.08474	-4.1261	-2.71979
Ralb	-1.94953	-4.11553	-2.70775
Msh6	-1.91859	-4.10644	-2.70093
Osr2	-2.56843	-4.09032	-2.68744
Ifi35	-1.98048	-4.07733	-2.67427
Plk2	-3.9919	-4.06265	-2.65903
Mex3b	-3.00166	-4.01501	-2.60172
Uchl1	-2.35182	-3.99331	-2.58546
Gpcpd1	-1.8567	-3.9902	-2.58546
Glrx	-2.28993	-3.94174	-2.52572
Tubb5	-1.8567	-3.92708	-2.50693
Pdgfra	-2.72316	-3.91448	-2.49111
Pygb	-2.59938	-3.89196	-2.4606
Ckb	-1.70197	-3.88754	-2.45676
Tbx15	-2.41371	-3.82731	-2.37519
Foxh1	-2.32087	-3.82406	-2.37302
Porcn	-2.25898	-3.81492	-2.36734
Zyg11a	-2.19709	-3.79031	-2.34087
Hmgn5	-1.94953	-3.78739	-2.33906
Tet1	-1.98048	-3.76502	-2.31306
Pklr	-2.50654	-3.71323	-2.24213
Mep1b	-2.01142	-3.71078	-2.24094
Scd2	-2.01142	-3.70461	-2.23405
Zfp36l1	-2.63032	-3.69592	-2.22581
Glud1	-1.67103	-3.68723	-2.21584
Glipr2	-2.04237	-3.68152	-2.2129
Sparc	-2.07331	-3.68099	-2.2129
Zfp296	-2.10426	-3.67256	-2.20244
Agtrap	-1.54725	-3.6677	-2.19742
Tmem191c	-1.91859	-3.65422	-2.18157
Add3	-1.94953	-3.63844	-2.16087
Ccng1	-1.82575	-3.60496	-2.12463
Tex19.2	-1.94953	-3.58176	-2.09563
Hnf4a	-2.50654	-3.57687	-2.09404
Alg13	-1.60914	-3.57628	-2.09404
Dram1	-2.41371	-3.57037	-2.08942
Bin1	-2.25898	-3.55827	-2.07737
1700003M07Rik	-3.46584	-3.54479	-2.06082
Dock5	-2.16615	-3.52729	-2.04528
Klf2	-1.91859	-3.51149	-2.03041
St6galnac2	-1.88764	-3.51135	-2.03041
Dmtn	-2.07331	-3.4935	-2.01423
Pck2	-2.32087	-3.49293	-2.01423
Nid1	-1.94953	-3.46844	-1.98537
Cdk16	-1.60914	-3.4486	-1.9589
higher in TE	fold change (log)	Z-score	corrected Z-score
Krt18	5.87955	7.14469	6.00515
Lrp2	5.16781	7.14469	6.00515
Dab2	4.11568	7.14468	6.00515
Akr1b8	3.93001	7.14468	6.00515
Krt8	4.45608	7.14437	6.00515
Anxa2	3.93001	7.13985	6.00515
Dusp4	4.30135	7.08899	5.96227
Dppa1	3.83718	6.91359	5.77036
Id2	4.14663	6.83885	5.69621
Cldn6	4.05379	6.6955	5.57513
Gsn	3.373	6.55943	5.42331
Naga	3.24922	6.5127	5.37755
Vtcn1	4.51797	6.25214	5.08238
Fabp3	3.28017	6.24424	5.08204
Mbp	4.64175	6.08809	4.90914
Crb3	3.24922	6.03505	4.86059
Mab21l3	4.92025	5.72384	4.49834
Frmd4b	3.24922	5.62694	4.38642
Ap2a2	2.35182	5.62293	4.38642
Cbs	3.74434	5.61673	4.38575
Cryab	3.18733	5.45878	4.20309
Neu1	3.21828	5.45629	4.20309
S100a10	3.15639	5.42612	4.17121
Vgll3	3.86812	5.41818	4.16751
Tacstd2	3.18733	5.30871	4.0398
Eps8l2	3.06355	5.30367	4.03941
Kank1	3.58962	5.27355	4.01245
Lrrfip1	2.84694	5.20181	3.92558
Fam213a	2.72316	5.08503	3.78482
Slc15a2	3.83718	5.02646	3.71903
Dapk1	3.93001	5.01948	3.71528
Patl2	3.18733	5.00719	3.70444
Gm2a	2.16615	4.96599	3.65533
Tjp2	2.35182	4.96034	3.65305
Anxa3	2.84694	4.9542	3.65002
Trp53bp2	2.90883	4.93776	3.63329
Clic3	2.38276	4.91234	3.60458
Ube2h	2.32087	4.90131	3.59482
Pwwp2b	2.97072	4.88946	3.5839
Bmp8b	3.80623	4.86761	3.55962
Tmprss2	5.10592	4.85109	3.54231
Ddah1	2.35182	4.80769	3.49363
S100a11	2.41371	4.79284	3.47829
Tjp3	2.56843	4.72567	3.3992
Kremen2	2.66127	4.64201	3.30545
AU021092	2.44465	4.63438	3.29932
Slc9a3r1	2.72316	4.62286	3.29177
Rab17	3.12544	4.6071	3.28222
Lurap1l	3.58962	4.54681	3.20788
Cish	2.50654	4.52345	3.18376
Efhd2	2.38276	4.52088	3.18376
Gata3	2.72316	4.50293	3.16289
Ank	2.7541	4.4884	3.15048
Serpinb9b	2.59938	4.48595	3.15048
Endod1	3.93001	4.46134	3.12267
Dnmbp	2.38276	4.41404	3.06907
Epn3	4.02285	4.40989	3.06675
Bmyc	2.07331	4.3494	2.98625
Pdzk1	3.03261	4.30656	2.93318
eGFP	2.72316	4.28551	2.91373
Myo1c	2.07331	4.21347	2.81524
Upk1a	3.31111	4.20429	2.80554
Tnfrsf9	4.27041	4.19696	2.79843
Fgfbp1	2.87788	4.19065	2.79275
Fam213b	2.4756	4.17443	2.77289
Lgals4	2.56843	4.16336	2.76032
Nek6	2.25898	4.15339	2.74931
Slc5a11	2.38276	4.141	2.73477
Lctl	2.16615	4.12897	2.72071
Pdzk1ip1	2.56843	4.11017	2.70319
Trap1a	2.32087	4.10093	2.69611
Stard4	3.00166	4.09726	2.69389
Tspan8	2.41371	4.08857	2.68744
Iffo2	2.87788	4.06518	2.65971
Rnf122	2.44465	4.05587	2.65218
Abcb1a	2.41371	4.04888	2.64501
Camk1	2.22804	4.01602	2.60172
Trpm6	3.24922	4.0129	2.60156
Myo5b	2.38276	4.00324	2.59037
Cyp2s1	1.70197	3.99782	2.58546
Tinagl1	2.35182	3.99206	2.58546
Dusp3	2.10426	3.99052	2.58546
Cdx2	2.10426	3.98724	2.58392
Fgd3	3.49678	3.96974	2.56323
Creld1	3.24922	3.96928	2.56323
Park2	3.21828	3.8479	2.40055
Grhl1	2.44465	3.83122	2.37832
Ggta1	2.35182	3.81967	2.36914
Fuca2	1.98048	3.81677	2.36745
Cdc42ep5	1.98048	3.80838	2.36016
Ugp2	1.8567	3.80417	2.35662
D630045M09Rik	1.94953	3.80253	2.35662
Krt7	3.06355	3.7848	2.33774
Mid1ip1	2.93977	3.76793	2.3149
Cct6b	2.04237	3.74392	2.28371
Epas1	1.98048	3.72711	2.26073
Mtus1	2.04237	3.69735	2.22581
Efemp1	3.28017	3.68614	2.21584
Sdc4	1.70197	3.65987	2.18783
Cnn2	2.22804	3.63725	2.16087
Gas7	3.06355	3.63459	2.16087
Irf6	2.35182	3.63453	2.16087
Slc52a3	2.63032	3.62627	2.1505
Gpr4	2.19709	3.62146	2.14545
Cldn4	1.67103	3.6059	2.12463
Mapkapk3	1.91859	3.5958	2.11278
Wnt7b	2.01142	3.59294	2.11068
Arhgap32	2.63032	3.57742	2.09404
Actn4	1.42347	3.57095	2.08942
Lgals7	2.41371	3.5684	2.08863
Krt23	3.15639	3.55843	2.07737
Ccdc69	2.81599	3.54597	2.06082
Cystm1	1.5163	3.53079	2.04528
Gata1	2.22804	3.52939	2.04528
Txndc16	1.8567	3.52856	2.04528
Rin3	2.93977	3.52679	2.04528
Parva	3.00166	3.52575	2.04528
Mgl2	1.73292	3.52499	2.04528
Peak1	1.8567	3.51809	2.03665
Lrrc8e	2.87788	3.50601	2.02759
Ccdc42	2.90883	3.50582	2.02759
Ppargc1b	2.32087	3.50547	2.02759
Oas1f	3.77529	3.50067	2.02218
Acy3	2.10426	3.4849	2.00372
Flot2	1.79481	3.47665	1.99283
Slc22a20	3.00166	3.46976	1.98537
Trim2	2.90883	3.46796	1.98537
Cmip	1.94953	3.45472	1.96652

## Sheet: late 32-cell ICM vs TE
late 32-cell ICM vs TE
higher in ICM	fold change (log)	Z-score	corrected Z-score
Tdgf1	-6.43656	-7.1447	-6.14277
Upp1	-6.71506	-7.14466	-6.14277
Rnf130	-5.29159	-7.14453	-6.14277
Spic	-6.21994	-7.14453	-6.14277
Epha4	-4.6108	-7.13841	-6.14277
Sox2	-5.47726	-7.138	-6.14277
Fgf4	-5.2297	-7.03894	-6.04586
Gjb5	-4.67269	-6.63782	-5.61603
Rnd3	-4.17757	-6.29437	-5.24314
Pecam1	-4.08474	-6.26377	-5.21181
Fn1	-4.05379	-6.03038	-4.94225
Pdgfra	-4.14663	-6.02316	-4.94036
Uhrf1	-3.68245	-5.965	-4.88937
Osr2	-4.73458	-5.9037	-4.82179
Dgat2	-3.86812	-5.55916	-4.43811
Add3	-3.40395	-5.52867	-4.4082
Etv5	-3.55867	-5.33024	-4.19436
Klf2	-3.28017	-5.19591	-4.04272
Hand1	-3.65151	-5.17778	-4.02316
Tdh	-3.43489	-5.16654	-4.01223
Ly6g6e	-3.43489	-5.13315	-3.97959
Ssbp4	-3.40395	-5.10251	-3.95009
Oas1a	-3.40395	-5.0245	-3.86307
Gm3143	-4.02285	-5.00255	-3.84383
Esrrb	-3.28017	-4.96105	-3.79938
Akap2	-4.17757	-4.88793	-3.7168
Ggt1	-3.0945	-4.81136	-3.62896
Anpep	-3.21828	-4.74946	-3.55669
Dse	-3.49678	-4.58246	-3.35857
Plod2	-3.28017	-4.50358	-3.27636
Klrg2	-3.31111	-4.4565	-3.22554
Fgf10	-3.62056	-4.44194	-3.21077
Psmb9	-3.06355	-4.41313	-3.1814
Tcl1	-4.85836	-4.37374	-3.13824
Rgs19	-3.34206	-4.35734	-3.12211
Oas1g	-3.03261	-4.35057	-3.11928
Pvrl1	-2.66127	-4.32977	-3.09787
Ephb4	-2.93977	-4.27072	-3.03469
Pald1	-3.373	-4.2653	-3.02938
2200002J24Rik	-3.34206	-4.22609	-2.9862
Fam25c	-4.30135	-4.22092	-2.98113
Ppap2a	-2.53749	-4.20843	-2.9711
Psrc1	-2.7541	-4.20781	-2.9711
Tpst1	-2.63032	-4.1949	-2.96301
Hsd17b11	-2.78505	-4.18105	-2.95094
H2-K2	-2.44465	-4.18057	-2.95094
Nrg1	-3.373	-4.12369	-2.88066
Tcf7l2	-2.59938	-4.05962	-2.81393
Rcn1	-3.68245	-4.03237	-2.7868
Rai1	-2.69221	-3.98898	-2.73688
Map2k6	-2.63032	-3.97958	-2.72552
Qdpr	-2.63032	-3.97062	-2.71473
Cotl1	-2.87788	-3.96905	-2.71421
Cacnb1	-2.90883	-3.96704	-2.71404
Klf4	-2.44465	-3.9507	-2.69362
Tet1	-2.35182	-3.93044	-2.667
Nkx6-2	-2.41371	-3.9096	-2.64275
Rnd1	-2.69221	-3.90757	-2.64154
Ephx2	-3.9919	-3.89878	-2.63225
Gjb3	-2.32087	-3.89863	-2.63225
Ppm1a	-2.56843	-3.89204	-2.62782
Btk	-3.15639	-3.88954	-2.62592
Creg1	-2.4756	-3.88631	-2.62455
Flt3l	-3.34206	-3.85046	-2.58044
Slc45a4	-2.63032	-3.8423	-2.57049
Ralb	-2.19709	-3.82946	-2.55392
Casp3	-2.44465	-3.82027	-2.5456
Hmgn5	-2.41371	-3.81168	-2.53898
Sox12	-2.93977	-3.81125	-2.53898
Chrna9	-3.40395	-3.80287	-2.52865
Tbx15	-2.81599	-3.79317	-2.51641
S1pr2	-2.50654	-3.7642	-2.48137
Add1	-2.41371	-3.76321	-2.48137
AW551984	-3.43489	-3.74154	-2.45644
C77370	-2.69221	-3.72604	-2.43674
2310015A10Rik	-3.34206	-3.71392	-2.42133
Pdlim4	-3.18733	-3.69724	-2.40387
Elovl7	-2.16615	-3.68122	-2.38611
Sox21	-2.4756	-3.6731	-2.37585
Glrx	-2.22804	-3.66143	-2.36043
Bhmt	-2.25898	-3.65799	-2.35859
Mst1r	-3.31111	-3.65714	-2.35859
Jam2	-2.87788	-3.6216	-2.31278
Slc12a7	-2.19709	-3.59602	-2.2855
Fbxo31	-2.1352	-3.57819	-2.26789
Tcf23	-3.03261	-3.57159	-2.25963
Stk38	-2.04237	-3.56373	-2.2495
Sh3bgrl3	-2.01142	-3.5608	-2.24659
Msh6	-2.10426	-3.5553	-2.2424
Tmem106a	-3.15639	-3.5551	-2.2424
Aoc1	-3.12544	-3.54233	-2.22499
Plod1	-2.53749	-3.5346	-2.21776
Alpl	-3.40395	-3.51544	-2.19083
Bmp4	-3.93001	-3.51235	-2.18902
Rfx2	-2.50654	-3.50674	-2.18345
Socs3	-2.72316	-3.49304	-2.16858
Ptp4a3	-2.41371	-3.44562	-2.1114
Trp53	-1.91859	-3.42659	-2.0842
Rhob	-2.28993	-3.42407	-2.08175
Pcolce2	-3.373	-3.42114	-2.08002
Icam1	-3.58962	-3.41174	-2.0672
Ckb	-1.91859	-3.40222	-2.0553
Fgfrl1	-3.03261	-3.40208	-2.0553
Prdm14	-2.90883	-3.40072	-2.05458
Baiap2	-2.56843	-3.39642	-2.04984
Galnt11	-2.50654	-3.39147	-2.04984
Fgfr1	-2.25898	-3.3775	-2.03263
Calm5	-2.81599	-3.36001	-2.0074
4930452B06Rik	-2.22804	-3.33761	-1.97911
1500009L16Rik	-2.32087	-3.32107	-1.96096
Myrfl	-2.7541	-3.31718	-1.95628
higher in TE	fold change (log)	Z-score	corrected Z-score
Id2	9.03594	7.14469	6.14277
Gata3	7.39585	7.14469	6.14277
Lrp2	7.14829	7.14469	6.14277
Cldn6	6.8079	7.14469	6.14277
Ptges	6.59128	7.14469	6.14277
Krt18	6.56034	7.14469	6.14277
eGFP	6.28183	7.14469	6.14277
Cdx2	6.40561	7.14469	6.14277
Neu1	6.34372	7.14469	6.14277
Dppa1	6.77695	7.14469	6.14277
Akr1b8	5.50821	7.14468	6.14277
Dab2	5.75577	7.14467	6.14277
Krt8	5.75577	7.14456	6.14277
Dusp4	5.2297	7.14406	6.14277
Cldn4	5.29159	7.14295	6.14277
Anxa2	4.9512	7.13485	6.14277
Fabp3	4.9512	7.07935	6.08575
Bmyc	4.51797	6.98029	5.98457
Rab17	4.82742	6.89033	5.8866
Lrrfip1	4.51797	6.85635	5.85667
Lgals1	5.19876	6.854	5.85667
Serpinb9b	4.42513	6.79298	5.79155
Smtn	4.48702	6.49609	5.45503
Tmem125	5.47726	6.44554	5.40097
Cryab	4.23946	6.41863	5.37467
Dusp14	4.08474	6.36668	5.31853
Fam213b	4.3323	6.34718	5.30068
Tmprss2	5.32254	6.19455	5.13428
Crb3	3.83718	6.02073	4.94036
Pdzk1	4.70364	6.0011	4.92141
Gsta4	3.96096	5.96989	4.88937
Tmem62	3.83718	5.96328	4.88937
Epn3	4.88931	5.89284	4.81543
Wnt7b	4.05379	5.89142	4.81543
Tspan8	4.23946	5.87788	4.80319
Myo1c	3.89907	5.86402	4.79049
Trp53bp2	4.20852	5.83222	4.756
Clic3	3.74434	5.808	4.73059
Vgll3	4.73458	5.78871	4.71107
S100a11	3.40395	5.56227	4.43811
Ap2a2	3.21828	5.53415	4.41113
Frmd4b	4.76553	5.51114	4.39318
Nabp1	3.43489	5.51044	4.39318
Sdc4	3.7134	5.45939	4.33371
Slc15a2	4.36324	5.43604	4.3084
Ank	3.9919	5.43053	4.30515
S100a10	3.74434	5.41996	4.29559
Sh3d21	3.52773	5.4128	4.29021
Tjp2	3.34206	5.34449	4.20869
Vtcn1	4.27041	5.27909	4.13382
D630045M09Rik	3.43489	5.27114	4.12725
Lamb2	4.9512	5.21981	4.06615
Il17re	4.30135	5.2077	4.05427
Mid1ip1	4.05379	5.15821	4.00562
Prss8	3.89907	5.15625	4.00562
Mfsd7c	3.52773	5.11912	3.96497
Tacstd2	3.89907	5.10293	3.95009
Slc5a11	3.40395	5.06203	3.90181
Csta1	3.12544	5.0533	3.89373
Arhgap22	4.20852	5.03826	3.87761
Mbp	4.3323	5.01587	3.85501
Amotl2	3.40395	5.01186	3.8528
Acer1	4.27041	4.98387	3.82287
Iffo2	3.65151	4.97979	3.82048
Rin3	4.42513	4.9413	3.77694
Efnb2	3.24922	4.91931	3.75157
Fam65a	3.49678	4.91382	3.74728
Acot2	3.46584	4.85684	3.67956
Ggta1	3.7134	4.84478	3.66672
Smpdl3a	3.12544	4.83615	3.65829
Tmem171	4.11568	4.80699	3.62597
Cyp4f39	4.02285	4.78409	3.59899
Myh10	2.90883	4.7389	3.54558
Fmnl3	3.52773	4.73356	3.54123
Mad2l1bp	3.28017	4.72734	3.53573
Slc6a14	3.12544	4.70064	3.50351
Patl2	3.68245	4.66546	3.46009
Kbtbd13	3.96096	4.58635	3.35937
Fmnl2	2.78505	4.58501	3.35937
Fgfr2	2.87788	4.57756	3.35581
Tinagl1	3.06355	4.57518	3.35581
Mtf2	2.69221	4.57464	3.35581
Cish	3.18733	4.56378	3.34395
Slc22a23	4.14663	4.55783	3.33854
Capn2	4.11568	4.54481	3.32376
B4galnt1	4.11568	4.54234	3.32294
Cnn3	2.63032	4.52734	3.30548
Gm12169	2.7541	4.48635	3.25584
Cnn2	3.06355	4.48327	3.25413
Cyp2s1	2.69221	4.47338	3.24333
Cgnl1	3.31111	4.45655	3.22554
Efhd2	3.0945	4.45364	3.22406
Fam107b	3.06355	4.43969	3.21007
Clic4	2.7541	4.43165	3.20161
Rragd	2.97072	4.41892	3.18688
Slc2a3	3.58962	4.40898	3.1781
Camk1	2.97072	4.39716	3.16451
Dusp6	2.7541	4.37959	3.14317
5730559C18Rik	3.96096	4.37261	3.13824
Ddah1	2.66127	4.36342	3.12809
Rbms1	3.00166	4.35016	3.11928
Epcam	2.63032	4.34914	3.11928
Dkkl1	2.97072	4.34884	3.11928
Epas1	2.66127	4.33625	3.10447
Tnfrsf12a	3.06355	4.32208	3.08961
Txndc16	3.06355	4.31698	3.08482
Lgals4	3.18733	4.31179	3.0799
Epb4.1l5	2.78505	4.29429	3.05836
Tmsb10	2.63032	4.28644	3.04982
Frmpd1	3.62056	4.2793	3.04222
P2rx3	3.55867	4.27167	3.03469
Wnk2	3.15639	4.25291	3.01462
Tpm1	2.59938	4.23734	2.9955
Gpr4	3.40395	4.23491	2.99421
Arhgdib	3.7134	4.2263	2.9862
Clec10a	2.72316	4.21711	2.97792
Kank1	3.28017	4.2131	2.97441
Tfap2a	3.18733	4.2064	2.97109
Slc9a3r1	2.87788	4.19973	2.96392
Hk2	2.69221	4.19806	2.96356
Tmem54	3.62056	4.19503	2.96301
Ldoc1	3.9919	4.18986	2.95839
Spsb4	3.18733	4.18876	2.95839
Trpm6	3.80623	4.17004	2.93845
Endod1	3.55867	4.14322	2.90372
Vgll4	2.69221	4.13838	2.89894
Mtus1	2.81599	4.12	2.87817
Ptprf	2.63032	4.11922	2.87817
Pdzd3	3.06355	4.11771	2.8779
Gsn	2.69221	4.11354	2.87399
Slc39a4	2.7541	4.11167	2.8732
Atp1b1	2.7541	4.10862	2.872
Frk	2.84694	4.10821	2.872
B2m	2.63032	4.10392	2.86829
Ehd1	2.41371	4.10295	2.86829
Klf6	3.12544	4.09174	2.85469
Dsp	2.72316	4.05953	2.81393
Actn4	2.35182	4.05384	2.80783
Neo1	2.59938	4.05042	2.80484
AU021092	2.81599	4.04898	2.80459
Tfeb	2.81599	4.0477	2.80452
Dsc2	2.78505	4.03238	2.7868
Nek6	2.90883	4.03057	2.78601
Mpzl2	2.66127	4.022	2.7775
Cbs	2.81599	4.02196	2.7775
Ccdc42	3.24922	4.01442	2.76876
Ugp2	2.41371	4.01254	2.76783
Plekhf1	2.56843	3.96656	2.71404
Naga	2.59938	3.92798	2.6652
Gcnt1	2.53749	3.92017	2.65591
Fam213a	2.7541	3.896	2.63018
Myo5b	2.50654	3.89341	2.62815
Ripk4	2.59938	3.88677	2.62455
Acsl6	3.24922	3.85965	2.58866
Elf3	2.53749	3.85662	2.58597
Rnpep	2.32087	3.85426	2.58423
Ube2h	2.32087	3.82672	2.5516
Asb8	2.53749	3.82243	2.54711
Atp12a	3.31111	3.81534	2.54016
Emp2	2.66127	3.8139	2.53966
Efemp1	3.52773	3.78281	2.50321
F11r	2.28993	3.77445	2.49283
2610528J11Rik	2.63032	3.7689	2.48646
Arhgef16	2.53749	3.75646	2.47326
Wfdc2	2.44465	3.74787	2.46249
Gm2a	1.94953	3.74335	2.45754
Cyr61	3.24922	3.72569	2.43674
Mgl2	2.35182	3.71255	2.42087
G3bp2	2.35182	3.70342	2.40923
Sh3tc1	2.38276	3.69738	2.40387
Zfp667	2.90883	3.69661	2.40387
Dnmbp	2.41371	3.68196	2.38611
Abhd14a	3.15639	3.68144	2.38611
Fam117a	2.69221	3.66027	2.36021
Cnksr1	3.24922	3.64873	2.34786
Dnmt3l	2.28993	3.63656	2.33164
Tjp3	2.41371	3.6249	2.31613
B3gnt5	2.56843	3.61335	2.3022
Erbb2	2.7541	3.60956	2.2981
Adap2	2.22804	3.59959	2.2855
Dapk1	2.7541	3.5973	2.2855
Pak6	2.78505	3.5967	2.2855
Sptan1	2.19709	3.59623	2.2855
Errfi1	2.50654	3.58967	2.27764
Abcc4	2.93977	3.58812	2.27679
C330013F16Rik	3.00166	3.58179	2.26929
Kremen2	2.72316	3.58106	2.26929
Slc51b	3.06355	3.57954	2.26847
Gprc5a	2.38276	3.55817	2.24413
Cgn	2.32087	3.53882	2.22178
Zfp568	2.19709	3.53826	2.22178
Cers3	3.28017	3.51272	2.18902
Enpep	2.35182	3.5084	2.18454
Serpinb6b	3.12544	3.50042	2.17545
Magi3	2.93977	3.49643	2.1709
Chn2	3.15639	3.49408	2.16878
Casc4	2.07331	3.4869	2.16083
Lgals7	2.4756	3.48511	2.15953
Dab2ip	2.44465	3.48223	2.15664
Dlg3	2.28993	3.48136	2.15664
Wnt3a	2.56843	3.47302	2.14559
Wscd2	3.03261	3.47033	2.14292
Smad7	2.38276	3.45633	2.12339
Zfp185	2.7541	3.45232	2.11874
S100a14	2.81599	3.45043	2.11725
Sphk1	3.15639	3.42181	2.08002
2010300C02Rik	2.38276	3.3956	2.04984
Pla2g15	2.16615	3.39267	2.04984
Lurap1l	2.59938	3.39244	2.04984
Dnmt3b	2.25898	3.39184	2.04984
Slc5a6	2.4756	3.39155	2.04984
1810037I17Rik	2.04237	3.38851	2.04667
Rasd1	2.63032	3.38628	2.04461
Mab21l3	2.97072	3.35905	2.00724
Slc34a2	2.28993	3.35656	2.00476
Snx1	1.98048	3.35272	2.00022
Dapp1	2.56843	3.33717	1.97911
Slc22a5	2.63032	3.33443	1.97622
Anxa3	2.97072	3.33231	1.97427
Gyltl1b	2.38276	3.33011	1.97221
Tbc1d10c	2.84694	3.32485	1.96545

## Sheet: 64-cell ICM vs TE
64-cell ICM vs TE
higher in ICM	fold change (log)	Z-score	corrected Z-score
Tdgf1	8.35515	7.14469	6.2066
Upp1	9.562	7.14469	6.2066
Spp1	8.26231	7.14469	6.2066
Fam25c	7.55058	7.14469	6.2066
Fn1	7.21018	7.14469	6.2066
Bmp4	7.55058	7.14469	6.2066
Rnf130	6.34372	7.14468	6.2066
Spic	6.25089	7.14457	6.2066
Gjb4	6.189	7.12078	6.20195
Tdh	5.47726	7.11481	6.20195
Jam2	5.26065	7.09546	6.18407
Fgf4	6.21994	7.06464	6.15702
Sfrp1	4.9512	7.04905	6.14698
Pdgfra	6.59128	7.04274	6.14352
Mep1b	5.26065	6.9621	6.05515
Epha4	4.88931	6.91796	6.0083
Efcab10	5.04403	6.76234	5.84037
Ifitm2	4.73458	6.68427	5.75731
Pecam1	4.73458	6.6178	5.68394
Bhmt	4.48702	6.3649	5.40971
Tcl1	5.72482	6.3023	5.3428
Lifr	5.19876	6.23946	5.27227
Ly6g6e	4.30135	6.22524	5.25863
Pmm1	4.17757	6.10244	5.12603
Utf1	4.17757	6.02436	5.04794
Id3	4.17757	5.91358	4.92748
Plbd1	4.11568	5.85105	4.86097
Asns	4.08474	5.70004	4.70293
Etv5	3.96096	5.60356	4.59881
Pdpn	4.64175	5.45064	4.41855
Crygd	4.76553	5.30837	4.26526
1500009L16Rik	3.52773	5.02663	3.9568
Sox17	4.70364	4.98393	3.90942
Abcg1	3.74434	4.98034	3.90687
Casr	4.57986	4.91511	3.84038
Pou2f3	4.08474	4.89405	3.81765
Tet1	3.31111	4.86442	3.78588
Uhrf1	3.34206	4.86075	3.78306
Clec2i	4.6108	4.83875	3.75717
Lck	3.52773	4.79697	3.71679
Chn1	4.3323	4.76284	3.67711
Zp3	4.20852	4.7507	3.66345
Rcn1	4.48702	4.73377	3.6454
Pfkp	3.86812	4.71405	3.62376
Lrrc2	3.9919	4.71265	3.62366
Rnd3	3.62056	4.70251	3.6141
Gjb5	3.46584	4.63642	3.53223
Cd38	4.30135	4.62469	3.52296
Sat1	3.31111	4.62236	3.52285
Psmb9	3.31111	4.62189	3.52285
Crygc	4.45608	4.59871	3.49804
Pttg1	3.00166	4.56386	3.46495
Plscr1	4.08474	4.56166	3.46464
Nup62cl	3.31111	4.54712	3.44905
Ldha	3.46584	4.54077	3.44558
Lamb1	3.28017	4.53297	3.43839
Alg13	3.06355	4.52754	3.43289
Zscan10	3.52773	4.52548	3.43172
Slc13a5	4.05379	4.51015	3.41643
Eif4ebp1	2.97072	4.47831	3.37983
9030617O03Rik	4.08474	4.45182	3.35425
2410007B07Rik	4.08474	4.4444	3.34608
Syt9	4.20852	4.42616	3.32672
Gja1	3.06355	4.38205	3.27517
Akr1c21	3.9919	4.3685	3.26033
Ppm1a	3.0945	4.34801	3.23506
Slc6a15	4.11568	4.34107	3.23001
Ube2l6	3.31111	4.34014	3.23001
Zfp157	3.28017	4.33284	3.22346
Ppp1r14d	2.97072	4.3213	3.21243
Esrrb	3.31111	4.30503	3.19255
Atf3	4.11568	4.30302	3.19197
Ceacam10	3.03261	4.28785	3.17408
Zfp1	3.0945	4.28091	3.16894
B9d2	4.11568	4.26389	3.15056
Cyp2b23	4.14663	4.23103	3.11135
Kdm5b	2.84694	4.21785	3.09532
Morc1	3.0945	4.20372	3.07801
Cryge	3.43489	4.19628	3.06949
Dhrs4	3.0945	4.17842	3.04976
Gm3143	3.7134	4.16271	3.03304
Chmp4c	2.81599	4.13808	3.00398
4930548H24Rik	2.90883	4.11867	2.9857
Nucb2	3.21828	4.115	2.98206
Lama4	3.96096	4.09702	2.96063
Rimkla	3.21828	4.08461	2.94778
Dcaf12l1	3.31111	4.08093	2.9441
Il6st	2.93977	4.05143	2.90717
Gdf3	2.93977	4.01699	2.86588
Tfpi	3.89907	4.01432	2.86472
Ephx2	3.58962	4.01138	2.86197
Mesdc2	2.66127	4.00216	2.85168
Fam159b	3.18733	3.99597	2.84723
Fbp1	3.03261	3.97603	2.82628
D16Ertd472e	3.80623	3.95049	2.79652
Mamdc2	3.7134	3.94913	2.79584
Sox2	3.65151	3.94783	2.79529
Aqp8	3.43489	3.94616	2.79529
Dse	3.03261	3.94132	2.7899
Ifitm3	3.65151	3.90225	2.74044
Car9	3.62056	3.89955	2.73796
Tbx15	3.28017	3.89829	2.73796
Zan	4.02285	3.89551	2.73698
Fgf10	3.7134	3.89365	2.73656
Prdm14	4.14663	3.89036	2.73337
Mdk	2.72316	3.8852	2.72749
Nnmt	3.83718	3.87704	2.71751
Enpp3	3.55867	3.84271	2.67742
Hand1	3.62056	3.81915	2.64963
Ly6e	3.46584	3.80658	2.63571
Slc24a5	2.59938	3.78755	2.61177
Slc39a10	2.72316	3.75264	2.56911
Syce1	3.15639	3.72551	2.53699
Ppap2a	2.66127	3.68245	2.48574
Pcdh19	3.58962	3.66878	2.46878
Dhrs3	2.93977	3.66066	2.45849
Itpk1	2.84694	3.65774	2.45548
Fbxl20	2.56843	3.65353	2.45237
1190002N15Rik	3.55867	3.65322	2.45237
Anpep	3.49678	3.6376	2.43254
Msrb2	3.68245	3.63757	2.43254
Rnd1	2.97072	3.63338	2.42879
Gjb3	2.4756	3.62807	2.42369
Poglut1	2.44465	3.62542	2.42185
Ddhd1	2.7541	3.62023	2.4156
Tex21	3.373	3.61533	2.41082
1700061G19Rik	2.7541	3.5976	2.39105
Klf2	2.97072	3.59431	2.38746
Idh1	2.53749	3.57593	2.36354
Polr1b	2.44465	3.54691	2.32754
Oas1a	2.63032	3.54226	2.32466
Zmat5	2.28993	3.54197	2.32466
Lepre1	2.53749	3.53927	2.32185
H2-Eb1	3.43489	3.52892	2.31019
Tfrc	2.28993	3.52251	2.30207
Cdc42ep3	2.59938	3.49031	2.2653
Gja4	3.46584	3.48969	2.2653
Gm1631	3.40395	3.45858	2.22665
Usp13	3.373	3.45568	2.22447
Akap12	2.4756	3.45193	2.22007
Apcdd1	3.34206	3.45048	2.21898
Nkx6-2	2.63032	3.4399	2.20672
Gsc	2.93977	3.43477	2.20229
Serping1	3.49678	3.43252	2.20003
Trps1	3.24922	3.42962	2.19682
Trim28	2.32087	3.4232	2.19037
Sssca1	2.28993	3.41554	2.18234
Zfp459	3.06355	3.40524	2.16839
Deptor	2.35182	3.39292	2.15539
Sap30	2.44465	3.38303	2.14294
Zfp941	3.12544	3.3821	2.14256
Icam1	3.52773	3.38124	2.14237
Pnliprp2	3.03261	3.36884	2.1271
Nupr1	2.59938	3.36277	2.12072
Ctsb	2.35182	3.36107	2.12072
Jak3	2.72316	3.36011	2.12072
Ube2dnl1	3.21828	3.35986	2.12072
Shisa5	2.25898	3.35608	2.11616
Serpinb1a	3.68245	3.3504	2.10908
Gins2	2.32087	3.34993	2.10908
Steap1	2.59938	3.32955	2.08284
Cand1	2.44465	3.32887	2.08284
Cd2	3.15639	3.32877	2.08284
Smpdl3b	2.28993	3.32773	2.08225
1700013H16Rik	5.19876	3.32082	2.07495
Col4a1	2.44465	3.31442	2.06837
Timp1	2.4756	3.31104	2.06527
Ung	2.25898	3.30819	2.06222
Trpa1	3.43489	3.30769	2.06222
Siglecg	2.7541	3.29834	2.0531
Nid1	2.19709	3.29218	2.04651
2610015P09Rik	2.35182	3.28686	2.04354
Cd200	3.15639	3.28452	2.04191
Dpp4	3.31111	3.2835	2.04132
Rgs19	2.59938	3.28134	2.03995
Cbr1	2.1352	3.26874	2.02409
Hnf4a	3.28017	3.26435	2.01941
Tpst1	2.81599	3.25895	2.01322
Plekhg4	3.43489	3.25001	2.0018
Chrna9	3.03261	3.24522	1.99649
Arrdc5	3.12544	3.24092	1.99192
Ly6c1	3.18733	3.23073	1.97769
Rec8	2.7541	3.22963	1.97695
Slc1a4	3.12544	3.22478	1.97176
Itgb7	3.28017	3.22435	1.97176
Klf4	2.35182	3.21985	1.96773
Actl6a	2.1352	3.2126	1.95783
Fam46c	2.50654	3.21093	1.95624
higher in TE	fold change (log)	Z-score	corrected Z-score
Adh1	-7.58152	-7.14473	-6.2066
Anxa2	-6.59128	-7.14473	-6.2066
Dab2	-6.99357	-7.14473	-6.2066
Dppa1	-7.21018	-7.14473	-6.2066
Gata3	-8.16948	-7.14473	-6.2066
Lgals1	-8.01475	-7.14473	-6.2066
Lrp2	-7.79814	-7.14473	-6.2066
Tspan8	-5.94144	-7.14473	-6.2066
Cdx2	-7.05546	-7.1447	-6.2066
Id2	-7.95286	-7.1447	-6.2066
Krt18	-7.39585	-7.1447	-6.2066
Ptges	-6.34372	-7.1447	-6.2066
Slc15a2	-7.30302	-7.1447	-6.2066
Tmprss2	-6.52939	-7.1447	-6.2066
Akr1b8	-7.02451	-7.14466	-6.2066
Fam213b	-6.90073	-7.14466	-6.2066
Krt8	-6.09616	-7.14466	-6.2066
eGFP	-5.97238	-7.14466	-6.2066
Cldn4	-5.87955	-7.1446	-6.2066
Lrrfip1	-5.47726	-7.14409	-6.2066
Cldn6	-5.81766	-7.14389	-6.2066
Epn3	-6.4675	-7.14126	-6.2066
Cbs	-6.189	-7.13903	-6.2066
Fabp3	-5.87955	-7.13713	-6.2066
Wnk2	-6.21994	-7.13465	-6.2066
Myh10	-5.01309	-7.12425	-6.20195
Capn2	-6.09616	-7.11533	-6.20195
Cryab	-5.63199	-7.077	-6.16712
Tacstd2	-5.04403	-7.0565	-6.15164
Neu1	-5.38443	-6.89089	-5.98088
Tjp3	-5.07498	-6.78503	-5.86296
Camk1	-4.79647	-6.72879	-5.80521
Ank	-4.67269	-6.57848	-5.64179
Enpp1	-5.29159	-6.56733	-5.63216
Crip1	-4.27041	-6.53191	-5.59437
Tmem62	-4.20852	-6.44916	-5.50152
Gata2	-5.66293	-6.38286	-5.4275
Wnt7b	-4.39419	-6.34849	-5.39368
Cnn2	-4.39419	-6.22006	-5.25554
Gprc5a	-4.57986	-6.20223	-5.23758
Mbp	-5.47726	-6.11544	-5.13844
Capg	-4.27041	-6.09735	-5.12291
Dkkl1	-4.51797	-6.06237	-5.08484
Pgm2	-4.45608	-6.06028	-5.08484
Smpd1	-4.42513	-6.05382	-5.07999
Sh3d21	-4.20852	-5.95854	-4.97277
Tmem50b	-3.96096	-5.9512	-4.96678
Ahnak	-4.11568	-5.91986	-4.93229
Lcp1	-4.23946	-5.8966	-4.90995
Pcbp4	-5.19876	-5.86765	-4.87814
Entpd1	-5.01309	-5.82088	-4.82761
Hk2	-3.96096	-5.81421	-4.82219
Slc2a3	-4.57986	-5.78133	-4.78548
Cib2	-4.48702	-5.75837	-4.76056
Tpm1	-3.77529	-5.74692	-4.74934
Clic4	-3.93001	-5.74258	-4.74661
Actn4	-3.96096	-5.72273	-4.7253
Fam101b	-3.86812	-5.71773	-4.72172
P2rx3	-4.17757	-5.64349	-4.63748
Slc6a13	-4.39419	-5.6342	-4.62936
Frmd4b	-4.30135	-5.63192	-4.62936
Efhd2	-3.96096	-5.63088	-4.62936
Tmem125	-4.39419	-5.59851	-4.59502
Rab17	-4.02285	-5.40042	-4.36017
Snx1	-3.7134	-5.3989	-4.36017
Crb3	-3.93001	-5.39478	-4.35744
Tfeb	-3.83718	-5.39274	-4.35723
Fam65a	-3.74434	-5.38629	-4.35271
Ap2a2	-3.77529	-5.38537	-4.35271
Sord	-3.7134	-5.36717	-4.33273
Cish	-4.9512	-5.35839	-4.32422
Cgnl1	-3.49678	-5.28629	-4.24038
Vgll3	-4.76553	-5.26315	-4.21416
Msn	-4.17757	-5.25419	-4.20629
Hs3st3b1	-3.9919	-5.25324	-4.20629
Tdrp	-3.55867	-5.23565	-4.1868
Emp2	-3.52773	-5.22501	-4.17582
Smpdl3a	-3.62056	-5.2167	-4.16771
Dnmt3b	-3.77529	-5.19077	-4.13786
Car4	-4.67269	-5.18086	-4.12773
Patl2	-4.76553	-5.17164	-4.11841
Rin3	-4.64175	-5.15293	-4.09737
2610528J11Rik	-3.34206	-5.13	-4.07107
Lurap1l	-4.51797	-5.10324	-4.03996
Csrp1	-3.77529	-5.08612	-4.02075
Tmsb10	-3.24922	-5.0753	-4.00959
Tjp2	-3.34206	-5.07388	-4.00959
Ptgr1	-3.58962	-5.07212	-4.0094
Flot2	-3.58962	-5.04119	-3.97295
Kremen2	-4.64175	-5.01477	-3.94399
Arhgap22	-4.70364	-4.99507	-3.92138
Anxa3	-4.67269	-4.9648	-3.88938
Cdc42ep5	-3.43489	-4.95136	-3.87449
Nek6	-3.65151	-4.94693	-3.87086
Epas1	-3.55867	-4.94004	-3.86496
Slc6a14	-3.7134	-4.9392	-3.86496
Amotl2	-3.40395	-4.93429	-3.86068
Wipf1	-3.7134	-4.92314	-3.84859
Slc44a4	-3.62056	-4.90895	-3.83449
Cystm1	-3.18733	-4.88789	-3.81174
Dsp	-3.7134	-4.87831	-3.80153
Gsn	-3.46584	-4.83496	-3.75418
S100a11	-3.24922	-4.83209	-3.75234
Tinagl1	-3.62056	-4.8263	-3.74681
Myo1c	-3.58962	-4.824	-3.74566
Slc5a6	-3.31111	-4.8169	-3.73845
Bmyc	-3.52773	-4.80388	-3.72378
Csf3r	-3.34206	-4.77335	-3.68868
Aldh3b2	-4.30135	-4.74392	-3.65657
Acer1	-4.57986	-4.73093	-3.64349
Tfap2a	-4.05379	-4.70252	-3.6141
Cldn3	-3.7134	-4.63565	-3.53223
Slc9a3r1	-3.06355	-4.6279	-3.52399
Ccdc42	-3.9919	-4.62452	-3.52296
Pdzk1	-3.21828	-4.61618	-3.51717
Ppap2b	-3.12544	-4.60436	-3.50366
Tmco4	-3.21828	-4.59748	-3.49804
Smtn	-3.43489	-4.59096	-3.49128
Ppp1r3b	-3.74434	-4.58918	-3.49058
Pon2	-3.80623	-4.58689	-3.48921
Cacnb3	-3.52773	-4.57909	-3.48172
Pard6b	-3.18733	-4.57861	-3.48172
Pdzd3	-3.46584	-4.5631	-3.46495
Abhd14b	-4.30135	-4.55044	-3.45178
Enpep	-3.40395	-4.54449	-3.44855
Echdc3	-4.39419	-4.54438	-3.44855
Slc34a2	-3.34206	-4.53974	-3.44558
Frk	-3.74434	-4.52187	-3.42856
Tagln2	-3.18733	-4.52069	-3.4285
Cnn3	-2.97072	-4.5003	-3.40523
Ggta1	-3.83718	-4.49288	-3.39714
Lgals4	-3.373	-4.47685	-3.37946
Cldn7	-3.00166	-4.47579	-3.37946
Csta1	-3.21828	-4.46976	-3.37311
Dusp14	-3.373	-4.46623	-3.36999
Gm2a	-2.35182	-4.46186	-3.36577
Hsd17b6	-3.74434	-4.43742	-3.33848
AU021092	-4.20852	-4.42983	-3.33007
Pla2g15	-3.31111	-4.41985	-3.31996
Fam107b	-2.84694	-4.40752	-3.3054
Cyp2s1	-3.28017	-4.39565	-3.29142
Satb2	-2.84694	-4.37914	-3.27278
Obp2a	-3.9919	-4.34238	-3.23001
Havcr1	-2.97072	-4.33994	-3.23001
B2m	-3.06355	-4.33424	-3.22394
Anxa6	-3.06355	-4.32953	-3.22049
B3gnt5	-3.18733	-4.32436	-3.21509
Slc5a11	-3.28017	-4.30257	-3.19197
Atp6v0a4	-3.06355	-4.28607	-3.17307
Ddah1	-3.00166	-4.28406	-3.17175
Vtcn1	-4.02285	-4.27962	-3.16854
Abca3	-3.49678	-4.26952	-3.15663
D630045M09Rik	-3.21828	-4.25591	-3.1414
Ypel2	-2.90883	-4.25266	-3.13843
Tmsb4x	-3.52773	-4.18386	-3.05527
Mapkapk3	-3.86812	-4.18356	-3.05527
Tpi1	-2.87788	-4.17021	-3.04018
Chrna1	-3.40395	-4.16537	-3.03506
Plec	-3.24922	-4.16193	-3.03304
Tmem79	-2.90883	-4.15927	-3.03077
Peli2	-3.83718	-4.13573	-3.00212
Oat	-2.90883	-4.1347	-3.002
Stard10	-3.00166	-4.13224	-2.99999
Elf3	-3.18733	-4.12482	-2.99139
Mgst3	-2.78505	-4.12277	-2.98992
S100a10	-2.97072	-4.10303	-2.96739
C430049B03Rik	-2.97072	-4.08941	-2.95174
Prss8	-2.97072	-4.0869	-2.94961
Sgk1	-2.72316	-4.0685	-2.92875
Gcnt1	-2.84694	-4.0474	-2.90299
Myh9	-2.63032	-4.01948	-2.8675
Tpm4	-2.63032	-4.01911	-2.8675
Eomes	-2.90883	-4.01466	-2.86472
Rragd	-2.97072	-4.00194	-2.85168
Slc22a23	-3.80623	-4.00069	-2.8512
Il17re	-3.31111	-3.99744	-2.84802
Adap2	-2.81599	-3.98966	-2.83993
Gpr4	-3.80623	-3.98473	-2.83447
Ctsh	-3.65151	-3.97951	-2.82931
Cstb	-2.69221	-3.97915	-2.82931
Mapre3	-3.06355	-3.9627	-2.80949
Slc39a4	-2.90883	-3.95923	-2.80598
Ugp2	-2.56843	-3.95703	-2.80419
Mfsd7c	-2.78505	-3.94662	-2.79529
Slc16a13	-3.00166	-3.93596	-2.78381
Ptprf	-2.66127	-3.92283	-2.7672
Arhgdib	-3.83718	-3.8979	-2.73796
Stard4	-2.97072	-3.89685	-2.73767
Dag1	-2.69221	-3.89354	-2.73656
BC053393	-2.93977	-3.87279	-2.71285
Pls3	-2.69221	-3.86726	-2.70644
Rnpep	-2.59938	-3.85648	-2.69288
Aktip	-2.56843	-3.85016	-2.68538
Wnt3a	-3.74434	-3.84511	-2.67959
Cln6	-2.97072	-3.83559	-2.6688
Mid1ip1	-3.55867	-3.82988	-2.6621
Gsta4	-2.87788	-3.82693	-2.65918
Clic3	-2.97072	-3.81357	-2.6431
Naga	-2.84694	-3.80712	-2.63571
Plekhb2	-2.81599	-3.79289	-2.61801
Fgfr2	-2.90883	-3.78284	-2.60638
Wdr1	-2.4756	-3.77493	-2.59658
Mycbpap	-3.62056	-3.7728	-2.59475
Rbm47	-2.56843	-3.75275	-2.56911
Ell3	-2.69221	-3.75129	-2.56834
Serpinb9b	-2.84694	-3.74931	-2.56669
S100a16	-3.65151	-3.74779	-2.56567
Slc30a2	-2.7541	-3.72553	-2.53699
Ovol1	-3.74434	-3.71965	-2.52994
Slc38a1	-3.00166	-3.71286	-2.5216
Perp	-2.53749	-3.7086	-2.51676
Mbnl3	-2.78505	-3.69584	-2.50007
Blvra	-2.41371	-3.69387	-2.49842
Slc6a8	-2.87788	-3.69027	-2.49448
Llgl2	-2.66127	-3.68735	-2.49149
Pwwp2b	-3.0945	-3.67984	-2.48317
Nlrx1	-2.7541	-3.65395	-2.45237
Lmna	-2.50654	-3.63428	-2.42899
Sh3bgrl2	-2.66127	-3.6299	-2.42496
Irf6	-3.62056	-3.62749	-2.42369
Fgd4	-2.87788	-3.61727	-2.41248
Crip2	-2.44465	-3.61459	-2.41082
Tuft1	-2.78505	-3.6131	-2.40976
Phf19	-3.7134	-3.6098	-2.40616
Socs1	-3.0945	-3.6024	-2.39677
Timd2	-2.78505	-3.58038	-2.3688
Cers3	-2.81599	-3.55555	-2.33567
Mycn	-3.00166	-3.5535	-2.33379
Fam213a	-2.4756	-3.55006	-2.32995
Cdk2	-2.56843	-3.54839	-2.32861
Cndp2	-2.4756	-3.54505	-2.32594
Slc44a2	-2.53749	-3.54264	-2.32466
Mtf2	-2.35182	-3.53377	-2.31504
Pacsin2	-2.28993	-3.53046	-2.31136
Cgn	-2.28993	-3.51944	-2.29872
Rnh1	-2.28993	-3.51856	-2.29849
Pdzk1ip1	-2.7541	-3.51248	-2.29082
Frs2	-2.56843	-3.50462	-2.2806
Mbnl2	-2.63032	-3.50173	-2.27748
Agrp	-2.66127	-3.49715	-2.27193
Ttc7b	-2.78505	-3.49581	-2.27104
Flii	-2.59938	-3.48986	-2.2653
Efnb2	-2.56843	-3.47868	-2.25052
Prc1	-2.44465	-3.46825	-2.23653
Sh3tc1	-2.59938	-3.46123	-2.22763
Nxf7	-3.52773	-3.46067	-2.22763
Arpc5	-2.35182	-3.4589	-2.22665
Myl12b	-2.16615	-3.45703	-2.22542
Trim2	-3.0945	-3.44827	-2.2168
Cited4	-3.34206	-3.44527	-2.21346
Igsf3	-2.4756	-3.43902	-2.20643
Acsl6	-3.03261	-3.43736	-2.20503
Pak6	-2.84694	-3.42448	-2.19037
Ptrf	-2.53749	-3.42312	-2.19037
Slc35e4	-2.7541	-3.41936	-2.18591
Vill	-2.72316	-3.41836	-2.18544
Tmem213	-3.24922	-3.40243	-2.16529
Cnnm4	-2.41371	-3.40138	-2.16475
Elf5	-3.18733	-3.39765	-2.1603
Egln1	-2.19709	-3.39565	-2.15838
Serpinb6b	-3.40395	-3.39022	-2.15243
Dnmt3l	-2.53749	-3.38064	-2.14237
Cdkn2c	-2.63032	-3.36999	-2.12782
Steap3	-2.38276	-3.36306	-2.12072
Exph5	-3.40395	-3.3612	-2.12072
Cxcl16	-2.87788	-3.36048	-2.12072
Gsto1	-2.41371	-3.34757	-2.10657
Pnma5	-2.4756	-3.33826	-2.0939
Tada1	-2.32087	-3.3258	-2.08038
Gyltl1b	-2.50654	-3.32288	-2.07703
Limd1	-2.41371	-3.31891	-2.07309
Gpr137b-ps	-2.19709	-3.31727	-2.07161
Erbb3	-2.41371	-3.31127	-2.06527
Syngr2	-2.22804	-3.30572	-2.06024
Kbtbd13	-2.4756	-3.30152	-2.05588
Paqr4	-2.59938	-3.30149	-2.05588
Ctdspl	-3.34206	-3.30001	-2.05463
Gm12169	-2.16615	-3.29295	-2.04651
Serpinb6c	-2.53749	-3.2915	-2.04651
Klf6	-2.56843	-3.29136	-2.04651
5730559C18Rik	-3.31111	-3.29006	-2.04583
Ccdc69	-3.31111	-3.28965	-2.04583
Slc39a2	-2.87788	-3.28902	-2.04581
Frmpd1	-3.24922	-3.28571	-2.04276
Lad1	-3.24922	-3.28179	-2.03995
Parp4	-3.21828	-3.27938	-2.03796
Cebpa	-2.7541	-3.26944	-2.02422
Slc46a1	-2.41371	-3.26808	-2.02401
Csrnp1	-2.16615	-3.26226	-2.01722
Efemp1	-3.18733	-3.2527	-2.00487
Wbp2	-2.25898	-3.24768	-1.99925
Cyb561a3	-2.38276	-3.24107	-1.99192
Kank1	-2.32087	-3.22614	-1.97265
Limk2	-2.25898	-3.2236	-1.97154
Vamp8	-2.19709	-3.22241	-1.97067
