# Supplementary material for: Position- and Hippo signaling-dependent plasticity during lineage segregation in the early mouse embryo
Source: eLife journal article supplement (doi:10.7554/elife.22906), 2017-02-22
Supplement: supp [file elife-22906-supp-v1.zip › elife_poa_e22906_Figure_3_source_data_2.xlsx]

## Sheet: 16-cell ICM vs e32-cell ICM
16-cell ICM vs early 32-cell ICM
higher in 16-cell ICM	fold change (log)	Z-score	corrected Z-score
Obox6	2.78505	5.62554	4.06205
Dnajc21	2.59938	5.22547	3.5402
Sox15	2.72316	5.0028	3.308
2310040G24Rik	2.35182	4.86896	3.1994
Acsl4	2.66127	4.82963	3.16674
Slc6a6	2.10426	4.82172	3.16674
Ovol2	2.63032	4.76782	3.13671
Larp4	2.59938	4.69811	3.10019
Tmem50b	2.28993	4.67949	3.0949
Tfrc	2.41371	4.6787	3.0949
Bbx	2.25898	4.58047	2.99376
Aven	2.19709	4.50196	2.88822
Tob2	2.22804	4.46896	2.85848
Wtap	2.66127	4.43461	2.8257
Odc1	2.25898	4.39412	2.77412
Fkbp10	3.21828	4.35631	2.72607
Gm13102	3.31111	4.33906	2.70864
Slc12a2	2.4756	4.30224	2.67771
Gps2	1.98048	4.28092	2.66109
Cnnm4	2.4756	4.26088	2.63832
Card11	3.0945	4.22823	2.61071
Cebpa	2.41371	4.20391	2.58773
Papd5	2.07331	4.19313	2.57814
Hdgf	2.01142	4.18511	2.57264
Gm11517	2.16615	4.1325	2.51811
Cnot6l	1.98048	4.08487	2.45725
Arhgap32	2.53749	4.07618	2.45548
Sp110	2.07331	4.06676	2.45548
Nin	2.16615	4.04769	2.44085
Crb3	2.28993	4.03639	2.42893
Malat1	2.04237	4.01327	2.41462
Eif3b	1.91859	4.00467	2.4065
Gata6	2.07331	3.99519	2.40143
Chka	2.01142	3.99247	2.40143
Cecr2	2.01142	3.99158	2.40143
Ugcg	2.01142	3.93654	2.32086
Larp1b	2.07331	3.92634	2.31964
Rtn4r	3.34206	3.91642	2.30894
Fzd5	2.01142	3.91323	2.30869
R3hdm2	1.8567	3.87198	2.27597
Pum2	1.91859	3.86515	2.26963
Gm11544	2.28993	3.85374	2.25794
Itgb5	2.1352	3.8522	2.25794
Hspa1a	2.22804	3.84319	2.24804
Nr5a2	1.82575	3.8286	2.24577
Cd320	1.70197	3.80308	2.22547
Kcnh3	2.32087	3.7836	2.21367
Larp1	1.76386	3.77991	2.21317
Slc22a20	2.93977	3.77576	2.21317
C2cd2l	2.19709	3.77405	2.21317
Rcc2	1.8567	3.76493	2.20642
Xpr1	1.98048	3.76372	2.20642
Oog3	2.84694	3.76052	2.20642
Ovol1	2.25898	3.75547	2.20642
Ybx1	1.79481	3.75431	2.20642
Map1lc3a	1.67103	3.74402	2.19366
Lrrc8e	2.87788	3.73101	2.18319
Slc34a2	1.82575	3.72772	2.18129
Smarcc1	1.70197	3.72481	2.17995
Ppp1r12c	2.04237	3.7018	2.15026
Cenpb	2.69221	3.66591	2.11559
Bspry	2.01142	3.66211	2.11538
Enpp3	2.07331	3.66193	2.11538
Igf2r	1.88764	3.65801	2.11221
Eif5	1.76386	3.63781	2.0918
Setd8	1.70197	3.62532	2.07824
Rps2	2.38276	3.61838	2.0708
Hsh2d	2.87788	3.61634	2.0708
Padi6	1.91859	3.59861	2.053
C130074G19Rik	2.19709	3.58179	2.03854
Agpat9	1.57819	3.57877	2.03854
Gse1	2.1352	3.577	2.03854
Fbxl20	1.8567	3.57568	2.03854
Gata1	2.16615	3.56931	2.03392
Rragd	1.79481	3.54565	2.00558
Rusc1	2.01142	3.545	2.00558
Smarcd2	2.04237	3.53988	2.00001
Hand1	1.98048	3.53403	1.99841
Hnrnpab	1.54725	3.53146	1.99686
Otulin	1.8567	3.52671	1.9926
Atm	1.73292	3.52562	1.9926
Trim28	1.64008	3.52095	1.99014
Zc3h12a	1.91859	3.51777	1.99007
Rnf122	2.10426	3.51749	1.99007
Pak1	1.79481	3.49211	1.96013
Clpx	1.60914	3.49142	1.96013
higher in early 32-cell ICM	fold change (log)	Z-score	corrected Z-score
Upp1	-4.67269	-7.12741	-5.62241
Uhrf1	-3.62056	-6.92581	-5.49126
BC053393	-3.77529	-6.65142	-5.22079
Hmox1	-3.43489	-6.21271	-4.71667
Tdgf1	-3.21828	-5.81946	-4.24621
Herpud1	-3.24922	-5.63029	-4.06205
Zfp57	-2.7541	-5.14387	-3.45484
Gm8615	-2.35182	-5.08052	-3.39231
Bin1	-3.06355	-4.9812	-3.308
Rraga	-2.38276	-4.97178	-3.308
Srebf1	-2.66127	-4.9458	-3.29127
Tex19.2	-2.7541	-4.79706	-3.14744
Ppp2r5b	-2.28993	-4.77589	-3.13671
Clic1	-2.78505	-4.75869	-3.13671
Elovl7	-2.22804	-4.72925	-3.1076
Lgals9	-2.7541	-4.71679	-3.10262
Ccdc22	-2.44465	-4.7041	-3.10019
Timp1	-2.7541	-4.66262	-3.08244
Gjb5	-2.81599	-4.63786	-3.05706
Plin2	-2.38276	-4.6102	-3.0271
Ap2a1	-2.07331	-4.47604	-2.85952
Pck2	-2.53749	-4.45604	-2.84853
Nynrin	-2.72316	-4.33265	-2.70737
Fastk	-2.01142	-4.31891	-2.69486
Ccbl2	-2.07331	-4.29297	-2.67158
Ext2	-2.10426	-4.25114	-2.63686
Alpl	-2.81599	-4.25019	-2.63686
Sparc	-2.59938	-4.22023	-2.60561
Tfe3	-2.32087	-4.15296	-2.53043
Mdh1	-2.32087	-4.14888	-2.53043
Wdr1	-1.91859	-4.14147	-2.52552
Usp11	-3.28017	-4.12057	-2.50605
Calr	-1.82575	-4.06784	-2.45548
Cyb5r3	-2.07331	-4.06714	-2.45548
Glrx	-2.41371	-4.06448	-2.45548
Atg16l2	-1.94953	-4.05378	-2.44465
Tdrp	-1.91859	-4.02549	-2.41863
Slc38a4	-2.01142	-4.02081	-2.41863
Ppm1f	-1.94953	-4.01926	-2.41863
Slc2a1	-2.32087	-3.93056	-2.31964
Qdpr	-2.1352	-3.92943	-2.31964
Mcoln1	-1.91859	-3.90676	-2.30327
Tpp1	-2.19709	-3.90257	-2.30135
Impa1	-2.25898	-3.89352	-2.29498
Chac1	-2.90883	-3.89266	-2.29498
Gjb4	-2.4756	-3.88686	-2.29416
Apela	-2.44465	-3.88642	-2.29416
Gstp1	-2.32087	-3.83686	-2.24577
Pdia4	-1.79481	-3.8345	-2.24577
Slc25a5	-1.82575	-3.83325	-2.24577
Fscn1	-1.98048	-3.82959	-2.24577
Ogt	-1.79481	-3.82545	-2.24484
Ceacam1	-2.56843	-3.81152	-2.22696
Foxh1	-1.91859	-3.80662	-2.22547
Abhd12	-2.10426	-3.8035	-2.22547
Scd2	-2.10426	-3.80067	-2.22547
Aars	-1.64008	-3.79354	-2.21808
Akap12	-1.94953	-3.78744	-2.21474
Aldh16a1	-2.01142	-3.78663	-2.21474
Zc3hav1	-2.1352	-3.77444	-2.21317
Efr3a	-1.82575	-3.76216	-2.20642
9030617O03Rik	-3.03261	-3.75733	-2.20642
Sgpl1	-2.01142	-3.73767	-2.18705
Utf1	-2.07331	-3.73231	-2.18319
Zscan10	-2.81599	-3.70726	-2.15565
Hsp90b1	-1.67103	-3.69777	-2.14761
Pnma5	-2.07331	-3.69608	-2.14761
Cmbl	-1.73292	-3.6854	-2.13548
Fbln1	-2.16615	-3.6844	-2.13548
Acox3	-2.81599	-3.68234	-2.13546
Dpp3	-1.76386	-3.68046	-2.13546
Rp2h	-1.88764	-3.64959	-2.1019
Meis1	-3.12544	-3.64585	-2.09897
Mvk	-1.70197	-3.63758	-2.0918
Zfp668	-1.98048	-3.6254	-2.07824
Slc37a2	-2.44465	-3.61518	-2.0708
Arid5b	-2.01142	-3.61109	-2.06716
1110019D14Rik	-2.10426	-3.60892	-2.06654
Dnase2a	-1.73292	-3.58895	-2.04128
Natd1	-1.76386	-3.58772	-2.04128
Acp6	-1.8567	-3.58243	-2.03854
Pdia6	-1.57819	-3.57948	-2.03854
Col7a1	-2.32087	-3.57083	-2.03392
Zfp444	-1.79481	-3.56776	-2.03392
Epcam	-1.79481	-3.5651	-2.03233
Pygb	-2.22804	-3.5374	-1.99864
Sdc4	-2.19709	-3.53499	-1.99841
Slc38a7	-1.91859	-3.52098	-1.99014
Zyx	-2.04237	-3.51626	-1.99007
Cnpy2	-1.73292	-3.51039	-1.98315
Ly6e	-1.91859	-3.50559	-1.97793

## Sheet: 16-cell CO vs e32-cell ICM
16-cell CO vs early 32-cell ICM
higher in 16-cell CO	fold change (log)	Z-score	corrected Z-score
Crb3	3.65151	7.0268	5.82952
Obox6	3.24922	6.88855	5.70651
Krt18	3.65151	6.8027	5.62172
Chka	3.12544	6.66752	5.51837
Slc30a2	3.40395	6.49437	5.32733
Dnajc21	3.03261	6.46705	5.31232
Dab2	3.03261	6.26658	5.09021
Cnnm4	3.28017	6.11336	4.94835
Sox15	3.03261	6.04416	4.87325
Stag2	2.59938	6.03906	4.87325
Rpph1	3.62056	5.99392	4.83268
Gata1	3.373	5.92465	4.76157
Wtap	2.87788	5.88853	4.72383
Tmem50b	2.63032	5.87107	4.71509
Sp110	2.93977	5.85983	4.70737
Gata6	2.69221	5.64837	4.45769
Lctl	2.56843	5.52181	4.32581
Ovol1	2.97072	5.45046	4.25335
Rnf122	2.81599	5.44849	4.25335
Tfrc	2.66127	5.44616	4.25335
Gm11517	2.41371	5.38262	4.17818
C2cd2l	2.69221	5.33444	4.12208
Odc1	2.38276	5.27776	4.05967
Sptan1	2.25898	5.2706	4.05773
Itgb4	2.78505	5.26889	4.05773
Aven	2.38276	5.23625	4.02069
Rragd	2.28993	5.20655	3.99414
C130074G19Rik	2.66127	5.19713	3.99414
Gm13102	3.55867	5.19424	3.99414
Acsl4	2.44465	5.18271	3.99022
Ovol2	2.56843	5.14096	3.9485
Slc34a2	2.28993	5.13695	3.9471
S1pr5	2.84694	5.12272	3.93264
Larp1b	2.56843	5.09808	3.91193
Lin28a	2.44465	5.08167	3.89447
Ankrd10	2.22804	5.07487	3.88923
Slc6a6	2.07331	5.04639	3.85706
Hdgf	2.32087	5.04439	3.85706
Socs3	2.72316	5.02704	3.83819
Hnrnpab	2.22804	5.00971	3.82066
Ap2a2	2.01142	4.99909	3.81396
Tle4	2.25898	4.99416	3.8122
Kcnh3	2.66127	4.99003	3.81003
Rprl3	2.81599	4.94787	3.76515
Fam129b	2.50654	4.92307	3.74221
Cldn6	2.59938	4.90845	3.72634
Ago4	2.50654	4.90247	3.72152
Gldc	2.10426	4.88398	3.7006
Dapk1	3.49678	4.84768	3.66502
2310040G24Rik	2.28993	4.84056	3.66062
Mtus1	2.44465	4.83745	3.65996
Epas1	2.32087	4.82699	3.64914
Slc6a8	2.19709	4.8003	3.61732
Mier3	2.25898	4.78568	3.60105
Larp4	2.38276	4.78216	3.5991
Pank3	2.41371	4.75087	3.57133
Sgk3	2.38276	4.74766	3.57045
R3hdm2	2.19709	4.74638	3.57045
Mad2l1bp	2.01142	4.72978	3.55381
Ccne1	2.04237	4.71241	3.53813
Papd5	2.16615	4.7105	3.53813
Srsf9	2.04237	4.71034	3.53813
Lrrc8e	3.34206	4.66365	3.48255
Setd2	2.07331	4.62791	3.44477
Gyltl1b	2.35182	4.61172	3.43039
Ptrh1	2.01142	4.60517	3.42844
Gfpt1	2.10426	4.59932	3.42296
Itgb5	2.16615	4.54003	3.35875
Pdxk	2.16615	4.53888	3.35875
Bbx	2.10426	4.53149	3.35727
Arrdc1	2.1352	4.52469	3.35237
Nr5a2	1.98048	4.4992	3.32687
Rps2	2.66127	4.49347	3.3213
Rb1cc1	2.04237	4.48953	3.31806
Pwwp2b	2.50654	4.47839	3.30537
Sirt1	1.98048	4.45475	3.27623
Ybx1	2.01142	4.45204	3.27608
Arhgap32	2.50654	4.44345	3.27006
Map1lc3a	1.73292	4.42782	3.25209
Rab5a	2.16615	4.39139	3.21038
Cd320	1.82575	4.39062	3.21038
Igsf1	3.12544	4.38507	3.20487
Pdcd7	2.41371	4.38369	3.20486
Ezh2	1.8567	4.38132	3.20353
Smarcc1	1.88764	4.37699	3.19961
Slc12a2	2.38276	4.34833	3.16523
Kank1	2.66127	4.32765	3.1418
Eps8l2	2.35182	4.32667	3.1418
Agpat9	1.70197	4.3167	3.1338
Eif3b	1.91859	4.29902	3.11534
Kremen2	2.28993	4.29337	3.10965
Hes1	2.07331	4.28437	3.10108
Kcmf1	1.82575	4.27461	3.08977
Hnrnpa1	1.76386	4.26139	3.07382
Lrp2	2.90883	4.25096	3.06324
Slc5a6	1.82575	4.24835	3.06308
Cebpa	2.35182	4.23949	3.05678
Snx30	1.98048	4.23874	3.05678
Bnip3	1.79481	4.2311	3.0482
Abcb1a	2.22804	4.22356	3.04134
Gse1	2.19709	4.21943	3.03922
Ube2h	1.82575	4.21855	3.03922
Anxa3	2.22804	4.21567	3.03922
Sos1	2.07331	4.21489	3.03922
Rhbdf1	2.38276	4.2093	3.03486
Slc16a6	2.22804	4.18962	3.01009
Grk6	2.04237	4.18224	3.00328
Clpx	1.76386	4.16987	2.99094
Rxra	2.10426	4.16787	2.99094
Crnkl1	1.82575	4.16674	2.99094
Hipk3	1.73292	4.16626	2.99094
Setd8	1.79481	4.14249	2.96501
Rcc2	1.76386	4.13787	2.96027
Srsf1	1.8567	4.13043	2.95467
Nin	2.10426	4.12434	2.94938
Fgfr3	2.28993	4.12094	2.94625
Cish	2.04237	4.11923	2.94538
Ugcg	2.04237	4.10347	2.92807
Ttc7b	1.88764	4.09974	2.92627
Rusc1	2.19709	4.09212	2.91882
Hsh2d	2.93977	4.07398	2.89718
Prc1	1.70197	4.07293	2.89715
Tbc1d10c	3.00166	4.06547	2.88847
Cecr2	1.94953	4.06016	2.88269
Gas6	2.32087	4.05199	2.87303
Usp1	1.94953	4.04588	2.86615
Trim28	1.67103	4.03759	2.85903
Smarca5	1.91859	4.03045	2.85208
Pabpc4	1.76386	4.02348	2.84932
Rab40c	1.91859	4.02348	2.84932
Ccnl1	1.67103	4.02027	2.84631
Rap1b	1.76386	4.01818	2.8448
Nlrp14	2.87788	4.01645	2.84376
Pqlc1	1.79481	4.01511	2.84366
Msmo1	1.76386	4.01445	2.84366
Rimklb	2.44465	4.01195	2.84287
Egln1	1.73292	4.00708	2.83756
Plk5	2.44465	4.00466	2.83614
Sppl3	1.70197	4.00413	2.83614
Btbd18	1.98048	3.99214	2.82139
Hnrnpl	1.67103	3.9908	2.82139
Csrp1	1.76386	3.9904	2.82139
Gpr137b	1.67103	3.98523	2.81816
Gls	2.01142	3.98374	2.8174
Sidt2	1.8567	3.97851	2.81404
Marcksl1	1.67103	3.97158	2.80712
Mta3	1.64008	3.96921	2.80514
Gm2a	1.67103	3.96562	2.8015
Smarcd2	2.10426	3.96308	2.79928
Topbp1	1.79481	3.94493	2.78365
Rarg	2.07331	3.94432	2.78365
Snta1	2.38276	3.94357	2.78365
Klf16	2.16615	3.93383	2.774
Stk24	1.73292	3.92882	2.76954
Smad7	2.35182	3.89757	2.73293
Cpeb1	2.4756	3.88072	2.71358
Nsmce4a	1.73292	3.87969	2.71358
Jag2	2.07331	3.87904	2.71358
Fermt2	1.91859	3.87493	2.71128
Paip2b	1.8567	3.87252	2.70913
Ddah1	1.73292	3.86648	2.70315
Strn3	2.07331	3.86418	2.70226
Eif5	1.73292	3.85618	2.69247
Slmap	1.64008	3.85009	2.68749
Padi6	1.88764	3.84419	2.68055
Madd	2.1352	3.84246	2.67929
Pttg1ip	1.48536	3.82361	2.65966
Ube2q2	1.64008	3.82327	2.65966
Pabpc1	1.5163	3.80349	2.64022
Trim33	1.64008	3.80232	2.64022
Myo9a	1.79481	3.80181	2.64022
Pak1	1.70197	3.79625	2.63448
AU018091	1.57819	3.78055	2.61824
Crls1	1.76386	3.76727	2.6042
Pum2	1.70197	3.75932	2.59432
Cnot6l	1.73292	3.74919	2.5835
Card11	2.38276	3.74605	2.58022
Sfpq	1.70197	3.73677	2.56951
Hapln4	2.38276	3.7185	2.54912
Slc22a20	2.7541	3.71827	2.54912
Arid1a	1.60914	3.70718	2.53583
Rasl11b	2.4756	3.69823	2.52851
Trim43a	1.73292	3.69645	2.52706
Ypel2	1.5163	3.69113	2.5217
Slc29a3	1.73292	3.68965	2.52066
Yy1	1.98048	3.6843	2.51683
Efna1	2.66127	3.68343	2.51683
Gm11544	1.94953	3.68307	2.51683
Wnk1	1.60914	3.67856	2.51321
Tmem189	1.76386	3.67615	2.51214
Pin1rt1	1.70197	3.67572	2.51214
Ing2	1.70197	3.67567	2.51214
Crip1	2.19709	3.67375	2.51113
Myc	2.22804	3.67354	2.51113
Zbed3	2.41371	3.66947	2.50647
Cryab	2.04237	3.66762	2.50488
Fam134a	1.64008	3.662	2.49902
Cdk1	1.54725	3.65676	2.49309
Nploc4	1.48536	3.65495	2.49263
Tjp3	1.73292	3.65463	2.49263
Otulin	1.76386	3.65249	2.49156
Myo1c	1.5163	3.65138	2.49097
Stard4	2.41371	3.6506	2.49083
Rtn4r	3.03261	3.64378	2.4842
Slc44a2	2.07331	3.64252	2.48339
Naga	1.76386	3.64013	2.48102
Naalad2	1.54725	3.63745	2.47917
Grm2	2.81599	3.63621	2.47838
Ubr5	1.57819	3.62825	2.46827
Fxr2	1.57819	3.62531	2.46513
Cyba	1.76386	3.62408	2.46434
Plk1	1.54725	3.61966	2.46006
Pex16	1.48536	3.60927	2.44655
Mcl1	1.5163	3.60187	2.43718
Noc2l	1.64008	3.59976	2.43516
Gcsh	1.54725	3.5939	2.43047
Tnks2	1.67103	3.59383	2.43047
Sbk1	2.04237	3.59087	2.42934
Rc3h1	1.70197	3.58969	2.42934
Anxa2	2.04237	3.58484	2.42348
Slc4a11	1.73292	3.58127	2.41941
Cenpe	1.64008	3.57243	2.41246
Mtss1	1.79481	3.56553	2.4055
Dennd3	2.66127	3.56264	2.40236
Bmpr1a	1.8567	3.56167	2.40189
Dcbld1	1.54725	3.55762	2.39843
Kank4	2.07331	3.55604	2.39841
Mgat4a	1.88764	3.55346	2.39611
Pink1	1.67103	3.55314	2.39611
Ppfia1	1.54725	3.55154	2.39475
Trim24	1.98048	3.54661	2.38992
Setd1b	1.57819	3.5466	2.38992
Ybx3	1.73292	3.54155	2.38513
Tsc22d4	1.57819	3.54013	2.38401
Tob2	1.73292	3.53934	2.38375
Phf3	1.48536	3.53833	2.3832
Ski	1.79481	3.53737	2.38272
Cul3	1.57819	3.53552	2.38099
Gm5088	1.48536	3.53156	2.37631
Larp1	1.48536	3.52829	2.37259
Rbm33	1.5163	3.52657	2.37105
Smad4	1.57819	3.5256	2.37054
Pknox1	1.45441	3.52326	2.36895
Eif5b	1.42347	3.52208	2.36814
Gid4	1.54725	3.51896	2.36623
Iffo2	2.07331	3.51891	2.36623
Kdm6b	1.5163	3.51135	2.35983
Dusp4	2.32087	3.50867	2.35807
Suz12	1.54725	3.50838	2.35807
Arf6	1.76386	3.50832	2.35807
Snx16	1.60914	3.50662	2.35652
Fzd3	1.79481	3.48983	2.33574
Ppfibp2	1.48536	3.48914	2.33574
Ell3	1.67103	3.48882	2.33574
Ppig	1.42347	3.48681	2.33375
Nr6a1	1.67103	3.48503	2.33288
Dirc2	1.64008	3.48151	2.32915
Hspa1a	1.94953	3.48121	2.32915
Rpl41	1.39252	3.47543	2.32269
Gps2	1.48536	3.47053	2.31662
Zfp703	1.73292	3.46368	2.30893
Hmga2	1.48536	3.45462	2.29833
Rcor2	1.60914	3.45141	2.29509
Ccdc9	1.60914	3.45117	2.29509
Ube2o	1.54725	3.44967	2.29378
Otoa	2.66127	3.44369	2.28617
Slco4c1	1.82575	3.43981	2.28312
Cthrc1	1.8567	3.42731	2.2687
Trib1	1.54725	3.41691	2.25877
Cab39	1.57819	3.41154	2.25433
Evi5	1.5163	3.4064	2.24824
Entpd7	1.54725	3.40577	2.24824
Lonrf3	1.82575	3.40234	2.24447
Mllt4	1.57819	3.37991	2.21817
Cmip	1.73292	3.36589	2.20291
Ctcf	1.45441	3.36441	2.20216
Atg101	1.36158	3.36427	2.20216
Srsf7	1.42347	3.36323	2.20183
Sart1	1.57819	3.36246	2.20183
Foxn3	1.73292	3.35588	2.19692
Hk1	1.79481	3.355	2.19692
Agap3	1.64008	3.35498	2.19692
Slc25a23	2.50654	3.35309	2.1954
Zmynd19	1.64008	3.35187	2.19523
Sgpp1	1.57819	3.35128	2.19523
Ldlrap1	1.39252	3.35088	2.19523
Fbxl20	1.67103	3.35086	2.19523
Cilp2	1.70197	3.34929	2.19384
Dusp7	1.98048	3.34884	2.19384
Slc39a1	1.45441	3.34096	2.18489
Tle3	1.70197	3.33786	2.18124
Hsd17b14	1.5163	3.33678	2.18045
Wwc2	1.45441	3.33483	2.17955
Atp13a3	1.36158	3.33408	2.17955
Mgat3	1.70197	3.33327	2.17915
Fam57b	1.45441	3.33273	2.1791
Kctd14	2.53749	3.32909	2.1754
Syde2	1.57819	3.3274	2.17392
Nr1d1	1.70197	3.32701	2.17392
C130026I21Rik	1.73292	3.3255	2.17392
Mknk2	1.60914	3.32301	2.17145
Wdtc1	1.36158	3.31685	2.16506
Yrdc	1.67103	3.3162	2.16506
Bspry	1.67103	3.3142	2.16293
Cited1	1.36158	3.31161	2.1614
Parp8	1.70197	3.30914	2.15861
Fkbp10	2.10426	3.30393	2.15443
Zbtb34	1.60914	3.3037	2.15443
Rsl24d1	1.33063	3.29537	2.144
Slc30a1	1.8567	3.29348	2.14202
Top2a	1.39252	3.28847	2.13629
Rab11fip5	1.57819	3.28328	2.13032
Asic1	2.44465	3.28212	2.12937
Pitpna	1.64008	3.28104	2.12853
Foxi3	1.98048	3.27695	2.1241
Nt5c	1.39252	3.27582	2.12343
Igsf3	1.70197	3.27495	2.12343
Osbpl6	1.5163	3.27451	2.12343
Ciita	2.44465	3.27299	2.12195
D630045M09Rik	1.57819	3.26543	2.11395
Phf13	1.45441	3.26367	2.11241
Git1	1.54725	3.26338	2.11241
Bmp8b	2.50654	3.26262	2.11202
Rad21	1.42347	3.26177	2.11148
Endod1	2.81599	3.2575	2.10677
Xylb	1.76386	3.2565	2.10603
Lpgat1	1.76386	3.25018	2.09838
Rras2	1.5163	3.24366	2.09111
Srpk1	1.33063	3.23025	2.07331
Sugt1	1.45441	3.2298	2.07331
Rmnd5a	1.45441	3.22746	2.07312
Zfp821	1.67103	3.22738	2.07312
Brd1	1.42347	3.22457	2.07127
Hras	1.70197	3.22105	2.06758
Gpd2	1.29969	3.21915	2.0662
Prosc	1.39252	3.2151	2.06374
Cyp7b1	2.19709	3.21384	2.06329
Ube2s	1.42347	3.20363	2.04997
Pcf11	1.73292	3.19455	2.03959
Clcnka	1.70197	3.19253	2.03742
Luc7l2	1.42347	3.19212	2.03742
Malat1	1.48536	3.18669	2.03225
Foxo1	1.5163	3.18501	2.0305
Kcnk4	1.94953	3.1802	2.02555
Nr1d2	1.57819	3.17809	2.02317
Myh10	1.54725	3.17349	2.01821
Agpat5	1.29969	3.17328	2.01821
Mast3	1.48536	3.17105	2.01565
Zc3h12a	1.67103	3.16879	2.01498
Tpd52	1.26874	3.16733	2.01487
Kmt2c	1.39252	3.16666	2.01479
Slbp	1.48536	3.16507	2.01355
Trip10	1.42347	3.16356	2.01202
Itln1	2.1352	3.1629	2.01172
Ptch2	2.35182	3.16067	2.00927
Dcaf4	1.2378	3.15694	2.0057
Nedd4l	1.57819	3.14425	1.99067
Nudt4	1.36158	3.14234	1.98975
Prr19	1.76386	3.13705	1.98466
Lmo7	1.5163	3.13258	1.98031
Ahctf1	1.36158	3.13228	1.98031
Mdn1	1.29969	3.13174	1.98016
Rbbp6	1.42347	3.13002	1.97859
Pla2g4e	2.19709	3.12488	1.97339
Bag1	1.29969	3.12337	1.97184
Rbm39	1.20685	3.11649	1.96502
Krt8	1.82575	3.1158	1.96465
Hbp1	1.39252	3.11136	1.95939
Tlk1	1.39252	3.11007	1.95821
Inhbb	2.35182	3.10909	1.95784
Mgea5	1.5163	3.10895	1.95784
Gas7	2.44465	3.10758	1.95674
Bok	1.39252	3.10733	1.95674
Tmem65	1.54725	3.1061	1.95585
Macf1	1.29969	3.10537	1.95585
Strada	1.36158	3.10501	1.95585
higher in early 32 ICM	fold change (log)	Z-score	corrected Z-score
Uhrf1	-4.45608	-7.14473	-5.87608
Upp1	-5.19876	-7.14473	-5.87608
Chac1	-4.42513	-7.14466	-5.87608
Herpud1	-3.68245	-7.14308	-5.87608
Elovl7	-3.03261	-7.1031	-5.86496
Hnf4a	-4.27041	-7.03876	-5.82952
Gss	-2.87788	-6.94149	-5.7499
Foxh1	-2.97072	-6.76473	-5.5927
Calr	-2.53749	-6.72514	-5.56039
Pck2	-3.43489	-6.68317	-5.52409
Gm8615	-2.72316	-6.48866	-5.32733
Tex19.2	-2.90883	-6.41854	-5.26427
Ggt1	-2.63032	-6.20334	-5.02293
Gjb5	-3.74434	-6.1781	-5.0015
Tpp1	-3.00166	-6.16836	-4.99858
Zfp57	-2.87788	-6.14022	-4.97285
Ccbl2	-2.63032	-6.02104	-4.85865
Hmox1	-3.52773	-5.98342	-4.82682
Adamts8	-4.30135	-5.87172	-4.71509
Ccdc22	-2.53749	-5.69753	-4.51289
Tdgf1	-3.15639	-5.61857	-4.4264
Srebf1	-2.7541	-5.58139	-4.38569
Plin2	-2.4756	-5.57177	-4.37932
Glrx	-2.90883	-5.52031	-4.32581
Bin1	-2.97072	-5.47695	-4.27668
BC053393	-2.84694	-5.30867	-4.09422
Tomm40l	-3.21828	-5.22963	-4.01674
Trib3	-2.93977	-5.20171	-3.99414
Spg20	-2.07331	-5.19907	-3.99414
Gm12794	-3.40395	-5.192	-3.99414
Ap2a1	-2.04237	-5.18764	-3.99258
Slc38a4	-2.25898	-5.14794	-3.94981
Zfp219	-2.25898	-5.14193	-3.9485
Cnpy2	-2.16615	-5.11597	-3.92765
Ogt	-2.04237	-5.10643	-3.91905
Ccnd3	-1.94953	-5.00822	-3.82066
Jam2	-2.28993	-4.99798	-3.81396
Xbp1	-2.41371	-4.9821	-3.80295
Klhdc3	-1.98048	-4.95992	-3.77758
Wdr1	-1.98048	-4.93035	-3.74565
Scd2	-2.50654	-4.92328	-3.74221
Arid5b	-2.35182	-4.87671	-3.69407
Tspan3	-2.28993	-4.87435	-3.69384
Ly6e	-2.44465	-4.87061	-3.69181
Pgls	-2.04237	-4.84004	-3.66062
Lgals9	-2.63032	-4.77953	-3.59828
Apoc1	-1.82575	-4.77399	-3.59368
Pdgfra	-2.69221	-4.76242	-3.58125
Clic1	-2.53749	-4.75098	-3.57133
Alpl	-2.78505	-4.74287	-3.56834
Nlrp4c	-2.69221	-4.71579	-3.53813
Pdia6	-1.82575	-4.6985	-3.52511
Sox2	-2.81599	-4.66217	-3.48255
Timp1	-2.19709	-4.64823	-3.4667
Slc25a13	-2.4756	-4.64106	-3.45965
Ccdc160	-2.22804	-4.62397	-3.4419
Col7a1	-2.7541	-4.61197	-3.43039
Cmbl	-2.01142	-4.60867	-3.42862
Crem	-1.98048	-4.60632	-3.42844
Rraga	-1.98048	-4.59348	-3.4175
Abcd4	-2.1352	-4.59091	-3.41628
Dpp3	-1.8567	-4.56934	-3.39022
Pdia4	-1.8567	-4.56623	-3.38827
Shmt2	-1.91859	-4.54425	-3.3616
Pygb	-2.4756	-4.53442	-3.35727
Hsp90b1	-1.76386	-4.53218	-3.35727
Ifi30	-1.94953	-4.53186	-3.35727
Hexa	-1.76386	-4.52754	-3.35411
Aars	-1.70197	-4.52133	-3.34997
Gjb3	-1.8567	-4.51105	-3.33848
Sparc	-2.41371	-4.50549	-3.33315
Dnase2a	-1.94953	-4.45174	-3.27608
Nupr1	-2.69221	-4.44969	-3.27526
Epha4	-2.19709	-4.44288	-3.27006
Mfsd1	-1.57819	-4.4118	-3.23283
Fam25c	-4.39419	-4.40138	-3.22092
Agpat1	-1.82575	-4.35773	-3.1759
Wbp1	-1.91859	-4.33919	-3.15488
Glo1	-1.76386	-4.32077	-3.13614
Ezr	-2.38276	-4.31977	-3.13614
Fam195b	-2.1352	-4.30245	-3.11658
Epcam	-1.76386	-4.29892	-3.11534
P4hb	-1.57819	-4.28528	-3.10108
Micu2	-2.04237	-4.25494	-3.06688
Rpap1	-2.10426	-4.24845	-3.06308
Fn1	-2.22804	-4.24544	-3.06154
Tmem106a	-1.91859	-4.24474	-3.06154
Fndc3a	-1.82575	-4.22629	-3.04339
Fbxw5	-1.91859	-4.21667	-3.03922
Mogat2	-2.87788	-4.21574	-3.03922
Acp6	-1.8567	-4.21272	-3.03787
Psmb9	-2.16615	-4.1883	-3.00986
Mcoln1	-1.91859	-4.17307	-2.99253
Sft2d2	-2.10426	-4.16821	-2.99094
Creg1	-1.76386	-4.15977	-2.98374
Ppap2a	-1.73292	-4.15329	-2.97762
Tfe3	-2.16615	-4.15299	-2.97762
Glipr2	-1.98048	-4.13473	-2.95753
Ift52	-1.94953	-4.13251	-2.95601
Sdf2l1	-1.64008	-4.12669	-2.95109
Abhd12	-1.94953	-4.11456	-2.94054
Fbxo21	-1.91859	-4.10318	-2.92807
Zfp428	-1.79481	-4.1	-2.92627
Gstp1	-2.28993	-4.09624	-2.92296
Cln5	-1.76386	-4.08506	-2.91071
Hspa5	-1.45441	-4.04269	-2.8632
Aldh16a1	-1.70197	-4.04087	-2.86211
Mfge8	-2.53749	-4.03099	-2.85208
Fastk	-1.67103	-4.02789	-2.84996
Slc38a7	-1.91859	-4.02399	-2.84932
Qdpr	-1.98048	-4.02391	-2.84932
Clcn7	-1.70197	-4.01214	-2.84287
Zc3hav1	-1.94953	-3.98811	-2.81955
Pecam1	-1.91859	-3.98686	-2.81911
Dusp18	-1.82575	-3.98277	-2.81732
Gja4	-2.32087	-3.98013	-2.81499
Hmgn5	-1.76386	-3.97679	-2.81294
Sdhd	-1.64008	-3.96142	-2.79825
Msto1	-1.82575	-3.95822	-2.79512
Ceacam10	-2.25898	-3.95444	-2.79127
Slc35f5	-2.01142	-3.95359	-2.79127
Sgpl1	-1.94953	-3.94948	-2.7869
Zdhhc16	-1.73292	-3.94642	-2.78394
Rbm12	-1.70197	-3.93803	-2.77733
Rnf187	-1.64008	-3.93554	-2.77513
Etv5	-1.64008	-3.93116	-2.77155
Plin3	-1.54725	-3.92108	-2.76021
Fbln1	-1.91859	-3.91263	-2.74991
Slc25a5	-1.60914	-3.91114	-2.74905
Fbp1	-2.1352	-3.90499	-2.74186
Rnd3	-2.56843	-3.89544	-2.73118
1110019D14Rik	-2.1352	-3.89296	-2.72897
Dxo	-1.67103	-3.87829	-2.71358
Ezh1	-1.70197	-3.8761	-2.71174
Pkm	-1.79481	-3.87034	-2.70728
Abcb6	-1.5163	-3.86536	-2.70274
Snhg18	-1.98048	-3.85082	-2.68749
Ralb	-1.70197	-3.8507	-2.68749
Mrpl24	-1.45441	-3.8344	-2.66939
Zdhhc12	-1.73292	-3.82793	-2.66165
Tuba4a	-1.54725	-3.82462	-2.65966
Hsd11b2	-2.53749	-3.82425	-2.65966
Nanog	-1.76386	-3.82199	-2.65899
Tmem184b	-1.94953	-3.81968	-2.65691
Glud1	-1.5163	-3.81684	-2.65411
Gstp2	-1.57819	-3.81338	-2.65045
BC048679	-1.79481	-3.80811	-2.64432
Ppp2r5b	-1.8567	-3.80159	-2.64022
Ext2	-1.70197	-3.80121	-2.64022
Soat1	-1.54725	-3.7921	-2.63015
Add3	-1.73292	-3.79151	-2.63015
Ephx2	-2.38276	-3.79077	-2.63015
Cyb5r3	-1.70197	-3.7892	-2.62904
Ccbl1	-1.82575	-3.77691	-2.61488
Porcn	-2.10426	-3.77657	-2.61488
Aco1	-1.57819	-3.77039	-2.60745
Akap12	-1.70197	-3.75382	-2.58821
Nynrin	-2.1352	-3.75337	-2.58821
Acaa1a	-1.54725	-3.73888	-2.57138
Amt	-1.82575	-3.73119	-2.56284
Mgarp	-1.48536	-3.73027	-2.5626
Ric8	-1.57819	-3.71883	-2.54912
Tpsg1	-2.1352	-3.71711	-2.54853
Lima1	-1.60914	-3.70595	-2.53515
Gnpat	-1.54725	-3.70316	-2.5323
Zfp668	-1.73292	-3.69949	-2.52851
Abcd3	-1.5163	-3.69846	-2.52851
Mthfd2	-1.67103	-3.69473	-2.52569
Zfp444	-1.67103	-3.68887	-2.52057
Cyp4f16	-2.25898	-3.68451	-2.51683
Slc25a39	-1.48536	-3.68259	-2.51683
Mdh1	-1.8567	-3.67873	-2.51321
Tmem40	-2.28993	-3.66526	-2.50256
Taf6l	-1.60914	-3.65634	-2.49309
2210016L21Rik	-1.54725	-3.65311	-2.49156
Arfgap3	-2.19709	-3.64623	-2.48572
Podxl2	-2.04237	-3.64495	-2.48489
Sppl2b	-1.82575	-3.63906	-2.48048
Coro1b	-1.54725	-3.62307	-2.46386
Btk	-1.8567	-3.59391	-2.43047
Ddit3	-1.82575	-3.59376	-2.43047
Prss35	-2.93977	-3.59289	-2.43017
AA467197	-1.76386	-3.59021	-2.42934
Ceacam1	-2.1352	-3.5898	-2.42934
Akr1e1	-1.57819	-3.58003	-2.41859
Wdr6	-1.91859	-3.57913	-2.41823
D10Jhu81e	-1.67103	-3.57826	-2.4179
Gdf15	-3.31111	-3.57623	-2.41597
Tubb5	-1.54725	-3.57414	-2.41395
Msh6	-1.57819	-3.57008	-2.41007
Ube2a	-1.5163	-3.56873	-2.40908
Ly6a	-1.94953	-3.55866	-2.39858
Dbi	-1.48536	-3.55725	-2.39843
Asah1	-1.60914	-3.55668	-2.39843
Insr	-1.73292	-3.54576	-2.38992
H2-Bl	-1.67103	-3.5456	-2.38992
Pick1	-1.45441	-3.52478	-2.37023
Ptgr1	-1.54725	-3.51969	-2.36623
St6galnac4	-1.45441	-3.51614	-2.36392
Dram1	-1.88764	-3.51597	-2.36392
Leprot	-1.39252	-3.51547	-2.36392
Gdi1	-1.94953	-3.5143	-2.36313
Hsd17b11	-1.70197	-3.50366	-2.35321
Slc37a2	-2.25898	-3.49653	-2.34407
Idh3a	-1.33063	-3.48594	-2.33334
Psap	-0.897405	-3.47702	-2.3241
Zyx	-1.94953	-3.46646	-2.31173
Ctc1	-1.48536	-3.46332	-2.30893
Praf2	-1.8567	-3.4556	-2.2989
Srp9	-1.42347	-3.4428	-2.28572
Fbxo3	-1.45441	-3.44104	-2.28404
Morf4l2	-1.29969	-3.43537	-2.2781
Pi4kb	-1.42347	-3.43512	-2.2781
Pcnxl4	-1.57819	-3.43127	-2.27347
Commd8	-1.33063	-3.42676	-2.2687
Tet1	-1.57819	-3.42516	-2.26725
Got1	-1.39252	-3.42404	-2.26646
Slc16a10	-1.5163	-3.4227	-2.26536
2200002J24Rik	-2.1352	-3.422	-2.26515
Mvk	-1.45441	-3.4162	-2.25855
Yipf2	-1.73292	-3.41561	-2.25851
Tes	-1.33063	-3.41282	-2.25536
Rexo2	-1.36158	-3.40557	-2.24824
Cyb561	-2.10426	-3.39292	-2.23193
Fam50a	-1.39252	-3.39185	-2.2312
Phykpl	-1.8567	-3.38683	-2.22486
Pycard	-2.1352	-3.38377	-2.22132
Psrc1	-1.70197	-3.38263	-2.22048
Agtrap	-1.26874	-3.38041	-2.21817
Fam21	-1.29969	-3.37466	-2.2115
Zscan22	-1.98048	-3.3727	-2.20949
Cpt1a	-1.57819	-3.3706	-2.2075
Prdx1	-1.26874	-3.37021	-2.2075
Prpsap1	-1.20685	-3.36654	-2.20308
Mut	-1.48536	-3.36242	-2.20183
Dctn1	-1.33063	-3.35807	-2.19692
Mamdc2	-1.8567	-3.35618	-2.19692
Zfp189	-2.7541	-3.35569	-2.19692
Cox7b	-1.54725	-3.35553	-2.19692
2310015A10Rik	-2.16615	-3.35469	-2.19692
Fbxo18	-1.54725	-3.3431	-2.18646
Hyou1	-1.42347	-3.34121	-2.18489
Gm7325	-2.4756	-3.33522	-2.17955
Cc2d1b	-1.60914	-3.33425	-2.17955
AI987944	-1.79481	-3.33174	-2.17843
Dtd2	-1.33063	-3.32557	-2.17392
Rpa1	-1.2378	-3.32549	-2.17392
Ccng1	-1.54725	-3.32273	-2.17145
Tbc1d25	-1.5163	-3.31988	-2.16813
Lamb1	-1.45441	-3.31667	-2.16506
Rnf5	-1.26874	-3.31297	-2.1619
Adat1	-1.76386	-3.31222	-2.16156
Zswim1	-1.42347	-3.30778	-2.15738
Zscan10	-2.35182	-3.30395	-2.15443
Apela	-1.8567	-3.30379	-2.15443
Slc2a1	-1.82575	-3.30088	-2.15113
Spp1	-2.56843	-3.2885	-2.13629
Zfp574	-1.33063	-3.28404	-2.1307
Stk25	-1.39252	-3.27973	-2.12736
Rnf130	-1.45441	-3.27516	-2.12343
Osbpl1a	-1.88764	-3.27009	-2.11851
Akt2	-1.26874	-3.26958	-2.11849
Cox18	-1.26874	-3.26562	-2.11395
Gtsf1l	-1.42347	-3.25874	-2.10785
Rabl6	-1.39252	-3.2548	-2.10429
Prpf19	-1.26874	-3.2474	-2.09509
Erp29	-1.36158	-3.24436	-2.09143
Slc12a1	-1.8567	-3.23833	-2.08417
Vipas39	-1.36158	-3.2292	-2.07314
Sqstm1	-1.20685	-3.22741	-2.07312
Sesn2	-1.94953	-3.22728	-2.07312
Araf	-1.39252	-3.22642	-2.07256
Cars	-1.26874	-3.22579	-2.07234
Polg	-1.33063	-3.22342	-2.07029
Prrc1	-1.54725	-3.22033	-2.06722
Tmem231	-1.36158	-3.21736	-2.06462
Cd151	-1.39252	-3.21704	-2.06462
Ttll11	-2.66127	-3.21664	-2.06462
C030039L03Rik	-1.88764	-3.21514	-2.06374
Zkscan3	-1.8567	-3.21396	-2.06329
Hdgfrp2	-1.33063	-3.20545	-2.05192
Inpp5d	-1.5163	-3.20157	-2.04783
Fam162a	-1.60914	-3.20121	-2.04783
Psph	-1.39252	-3.19704	-2.0425
Lrrc58	-1.17591	-3.1898	-2.03474
Gins2	-1.36158	-3.1882	-2.03311
Papl	-2.4756	-3.18677	-2.03225
Hif1a	-1.42347	-3.18279	-2.02796
Armc9	-1.70197	-3.18059	-2.02555
Ndfip1	-1.33063	-3.17706	-2.02234
Dcakd	-1.5163	-3.17017	-2.01505
Fbln5	-2.4756	-3.16893	-2.01498
Skida1	-1.5163	-3.16877	-2.01498
Nutf2	-1.76386	-3.1676	-2.01487
Rnf181	-1.20685	-3.16734	-2.01487
Fam126a	-1.5163	-3.16638	-2.01479
Rhbdd3	-1.64008	-3.1603	-2.00927
Mapk1ip1	-1.5163	-3.15695	-2.0057
Oas1a	-1.48536	-3.15132	-1.99824
Cry1	-1.36158	-3.15045	-1.99762
Jak3	-1.79481	-3.14973	-1.99723
Atp6ap2	-1.26874	-3.14425	-1.99067
Ccdc71	-1.36158	-3.14361	-1.99067
Mpp1	-1.36158	-3.14342	-1.99067
Trim38	-1.39252	-3.14144	-1.98909
Reep5	-1.45441	-3.13892	-1.98643
Fabp5	-1.48536	-3.13871	-1.98643
Rhoc	-1.5163	-3.13613	-1.98397
Rp2h	-1.48536	-3.13511	-1.98313
Sh3bgrl3	-1.20685	-3.12978	-1.97859
Gm12942	-1.33063	-3.1279	-1.9765
Atg13	-1.17591	-3.12596	-1.97433
Slfn2	-2.1352	-3.12183	-1.97025
Slc35b4	-1.42347	-3.12015	-1.96844
Gm13128	-1.45441	-3.11804	-1.96601
Bambi	-1.73292	-3.11732	-1.96559
Commd4	-1.5163	-3.11131	-1.95939
Vsig10l	-1.5163	-3.10518	-1.95585

## Sheet: 16-cell CO vs e32-cell TE
16-cell CO vs early 32-cell TE
higher in 16-cell CO	fold change (log)	Z-score	corrected Z-score
Hand1	3.7134	7.14468	5.93685
Obox6	3.7134	7.14441	5.93685
Spic	3.86812	7.14424	5.93685
Id3	3.24922	6.98198	5.8014
Sp110	3.18733	6.96802	5.8014
Acsl4	2.93977	6.26413	5.05453
Larp4	2.50654	6.14662	4.92185
Wtap	2.44465	6.11786	4.89759
Myc	3.21828	6.0662	4.84451
Klf2	2.84694	6.02467	4.80338
Ppm1a	2.25898	5.89988	4.65822
Socs3	3.00166	5.83474	4.58642
Plk2	4.6108	5.7151	4.46318
Slc16a6	2.84694	5.61956	4.37047
Gm11517	2.19709	5.5279	4.27859
Nt5c3b	2.01142	5.5264	4.27859
Hes1	2.50654	5.44684	4.19762
Gata6	2.28993	5.40896	4.15575
Rxra	2.35182	5.29051	4.02248
Igf2r	2.16615	5.23745	3.97164
Aacs	2.07331	5.22522	3.96148
Ulk1	1.98048	5.18892	3.92551
Cenpa	1.94953	5.16998	3.90632
Nr5a2	2.04237	5.1445	3.88774
Fgf4	3.80623	5.14378	3.88774
Ezh2	2.1352	5.12177	3.86417
Slc12a2	2.35182	5.06655	3.80688
Fbxl20	2.44465	5.05904	3.80174
Nin	2.38276	5.03916	3.78494
Trim43b	2.25898	5.02836	3.77965
Rpph1	2.97072	4.95146	3.70809
Zswim5	2.41371	4.94467	3.70333
Ptpn2	1.91859	4.87229	3.61642
Gm13102	3.373	4.84441	3.58452
Dnajc21	2.19709	4.84103	3.58452
Clp1	1.88764	4.80371	3.54842
Gm11544	3.00166	4.78552	3.53152
Lrrc42	2.07331	4.77442	3.52035
Gpcpd1	1.79481	4.7346	3.47462
Clpx	2.04237	4.68302	3.40958
Rcc2	1.82575	4.65309	3.37646
Trim28	1.91859	4.64198	3.36496
Sptbn2	1.98048	4.51899	3.22144
Ovol2	2.1352	4.50828	3.21725
Rmnd5b	1.79481	4.47935	3.18731
Larp1	1.73292	4.44477	3.14636
Ugcg	2.19709	4.43922	3.14178
Slc12a7	1.8567	4.4214	3.12047
Mier3	1.91859	4.41577	3.11572
Rusc1	2.32087	4.3891	3.08222
Cecr2	1.73292	4.37113	3.06051
Rest	1.73292	4.35507	3.04424
Tfrc	2.10426	4.33345	3.0202
Sox15	1.98048	4.31865	3.00264
Hnrnpab	1.98048	4.302	2.98993
Rnf19b	1.82575	4.30139	2.98993
Slc30a1	1.91859	4.29433	2.98978
Agpat9	1.5163	4.29388	2.98978
Trim24	1.79481	4.29196	2.98978
Arid1a	1.60914	4.2919	2.98978
Ankrd10	1.79481	4.28484	2.98309
Fam46c	1.88764	4.22902	2.9137
Sfrp1	2.16615	4.21821	2.90127
Nipal1	1.91859	4.20693	2.89002
Rprl3	2.38276	4.19573	2.88188
Sat1	1.64008	4.19515	2.88188
Pfkfb3	2.16615	4.1934	2.88188
Chka	1.79481	4.14639	2.82369
Dock5	2.25898	4.12879	2.80148
Sf3b1	1.5163	4.12621	2.80029
Hmga2	1.67103	4.11891	2.79247
Sidt2	1.70197	4.09513	2.76143
Atg101	1.60914	4.07628	2.73886
Ctsc	1.57819	4.07554	2.73886
Fdft1	1.70197	4.07235	2.73886
Map7	1.57819	4.05971	2.72337
Smarcd2	1.76386	4.05427	2.71805
Cdkn1a	3.0945	4.05264	2.71805
Pin1rt1	1.82575	4.03403	2.69633
Prr19	2.28993	4.02225	2.68192
Hdgf	1.70197	4.01356	2.67416
Rnf149	1.91859	3.99027	2.65178
Pank3	1.8567	3.97466	2.64101
Kdm5b	1.5163	3.96838	2.63422
Ei24	1.67103	3.92524	2.58113
Pabpc1	1.48536	3.91116	2.56515
Dmrtb1	1.79481	3.89515	2.55053
Efna1	2.04237	3.8933	2.54994
Dirc2	1.73292	3.86818	2.51991
Slc30a2	2.01142	3.85589	2.50829
Smarca5	1.79481	3.85536	2.50829
Etv5	1.94953	3.85451	2.50829
Sfpq	1.60914	3.85118	2.50548
Stk35	1.67103	3.82436	2.46864
Klf4	1.70197	3.80858	2.45169
Ppt2	2.04237	3.80667	2.45091
C130074G19Rik	1.76386	3.80023	2.44547
Mta3	1.42347	3.7953	2.44059
Cebpa	2.10426	3.78866	2.43482
Nid1	1.64008	3.78757	2.43482
Arf6	1.76386	3.78033	2.42811
Cnnm4	1.73292	3.76987	2.41633
Kcmf1	1.60914	3.76311	2.40869
Zbtb10	1.79481	3.74654	2.38824
Snx16	1.57819	3.74143	2.38539
Ppp2cb	1.5163	3.74055	2.38539
Mfsd5	1.60914	3.7395	2.38539
Dcaf4	1.45441	3.73049	2.37405
Usp1	1.76386	3.72751	2.37288
Crnkl1	1.54725	3.72718	2.37288
Enah	1.45441	3.71249	2.35314
Ypel5	1.60914	3.708	2.35028
Cth	1.60914	3.7015	2.34426
Ctcf	1.5163	3.69925	2.3434
LOC101056043	1.70197	3.69848	2.3434
Srsf9	1.57819	3.67333	2.31524
Pla2g12a	1.70197	3.6718	2.31475
Cdan1	1.54725	3.66796	2.31084
Nlrp14	2.50654	3.66479	2.30872
Epb4.1l4b	1.57819	3.66416	2.30872
Eif5b	1.39252	3.64164	2.28233
Chrna9	2.69221	3.64017	2.28187
Smarcc1	1.48536	3.62655	2.26394
Nkx6-2	1.91859	3.62576	2.26394
Macf1	1.48536	3.6123	2.24904
Spry4	1.88764	3.60339	2.23748
Sall1	1.5163	3.60128	2.23621
Nr4a1	2.07331	3.60028	2.23621
Ppfia1	1.5163	3.58918	2.22302
Uap1	1.45441	3.58521	2.22134
Srsf1	1.54725	3.57389	2.21011
Sugt1	1.42347	3.54584	2.17466
Zfp710	1.54725	3.54036	2.17291
Nsmce4a	1.73292	3.53454	2.17217
Cdk1	1.36158	3.53363	2.17217
Papd5	1.48536	3.53354	2.17217
Ppig	1.42347	3.53353	2.17217
Utp23	1.48536	3.53062	2.16938
Tnfsf13b	1.60914	3.52317	2.16267
Entpd3	1.82575	3.52003	2.16124
Odc1	1.73292	3.51805	2.16117
Tmem191c	1.54725	3.51752	2.16117
1700021F05Rik	1.26874	3.49345	2.1357
Bbx	1.48536	3.49055	2.13512
0610005C13Rik	1.8567	3.47169	2.10823
Mep1b	1.79481	3.46617	2.10139
Esrrb	1.64008	3.45886	2.09283
Enpp3	1.98048	3.45757	2.09283
D17Wsu92e	1.54725	3.45247	2.08935
Pdp2	1.45441	3.45235	2.08935
Itgb5	1.42347	3.44514	2.08056
4930432K21Rik	2.07331	3.4446	2.08056
Dpf3	1.54725	3.43386	2.07151
Eif3b	1.54725	3.43158	2.0695
Kmt2c	1.42347	3.42671	2.06499
Rtn4	1.42347	3.42556	2.06466
Hnrnpa1	1.33063	3.41676	2.05722
Ficd	1.82575	3.4129	2.05722
Sgk3	1.64008	3.41215	2.05722
Zbed3	2.10426	3.41197	2.05722
Rad21	1.54725	3.40961	2.05722
Gldc	1.33063	3.409	2.05722
Setd8	1.39252	3.4078	2.05722
Amhr2	1.48536	3.39907	2.04535
Tle4	1.42347	3.38492	2.02796
Esco2	1.45441	3.38072	2.02292
Fermt2	1.42347	3.37974	2.02279
Slc6a6	1.2378	3.37677	2.01981
AI661453	1.88764	3.37535	2.01981
Rab3il1	1.39252	3.37465	2.01981
E2f1	1.88764	3.37426	2.01981
Ttyh2	1.64008	3.36796	2.01328
Wtip	2.4756	3.36762	2.01328
Usp10	1.20685	3.36453	2.01033
Suz12	1.39252	3.36267	2.00882
Tdh	1.60914	3.3603	2.00652
Csk	1.5163	3.3589	2.00571
Strn3	1.45441	3.35673	2.00372
Pitpna	1.48536	3.35192	1.99769
Cnot11	1.70197	3.34126	1.98369
Tmem50b	1.36158	3.34102	1.98369
Grin1	1.67103	3.33866	1.98138
Nap1l1	1.33063	3.33412	1.97625
Brpf3	1.73292	3.33093	1.97475
Atp13a3	1.29969	3.32027	1.96144
Rarg	1.94953	3.31968	1.96144
higher in early 32-cell TE	fold change (log)	Z-score	corrected Z-score
Dppa1	-3.93001	-7.1447	-5.93685
Lrrfip1	-3.373	-7.1447	-5.93685
Slc15a2	-4.6108	-7.13803	-5.93685
Fabp3	-2.97072	-7.06804	-5.87876
Plekhb2	-3.21828	-6.6818	-5.48986
Serpinb6c	-2.50654	-6.67917	-5.48986
Tacstd2	-3.12544	-6.63177	-5.44816
Akr1b8	-2.35182	-6.4473	-5.2392
Epcam	-2.35182	-6.32675	-5.10586
Dusp3	-2.69221	-6.2748	-5.05529
Frmd4b	-2.50654	-5.76347	-4.50631
Trp53bp2	-2.41371	-5.73932	-4.48496
BC053393	-2.90883	-5.6391	-4.38367
Gsn	-2.44465	-5.63892	-4.38367
Patl2	-2.78505	-5.61615	-4.37047
Enpp1	-3.77529	-5.55104	-4.2955
Mab21l3	-2.87788	-5.5101	-4.2678
Tmem9	-2.35182	-5.50723	-4.2678
Pdzk1	-3.21828	-5.39347	-4.14225
Stat6	-2.72316	-5.36657	-4.11401
S100a10	-2.41371	-5.27483	-4.01163
Idh3a	-1.91859	-5.27292	-4.01163
Dsc2	-2.53749	-5.21551	-3.95445
Gm12169	-2.32087	-5.14755	-3.88774
Krt8	-2.63032	-5.11387	-3.85879
Hexa	-2.01142	-5.10606	-3.85343
Vtcn1	-2.44465	-5.04048	-3.78494
Klf6	-2.72316	-5.03463	-3.78346
Lrp2	-2.28993	-5.0219	-3.77705
Mbp	-2.69221	-5.01943	-3.77705
Nek6	-1.98048	-5.01667	-3.77705
Gsta4	-2.25898	-5.00428	-3.76504
Slc9a3r1	-2.4756	-4.96787	-3.72176
Slc22a5	-2.87788	-4.9513	-3.70809
Cldn7	-2.01142	-4.92221	-3.67789
Cyb5r3	-1.91859	-4.83942	-3.58452
Cib2	-2.78505	-4.82715	-3.57205
Slc35f5	-2.16615	-4.82237	-3.56938
Tspan8	-2.25898	-4.79451	-3.53986
Neu1	-2.56843	-4.76358	-3.50949
Cmbl	-1.88764	-4.65805	-3.3797
Txndc16	-2.19709	-4.63925	-3.36462
Fuca2	-2.19709	-4.62286	-3.34599
Siae	-2.25898	-4.61285	-3.33585
Pgm2	-2.56843	-4.55151	-3.25955
Bmyc	-1.79481	-4.55124	-3.25955
Id2	-2.53749	-4.51828	-3.22144
Tinagl1	-2.10426	-4.51372	-3.21844
Krt18	-2.22804	-4.50823	-3.21725
Tmprss2	-4.39419	-4.50561	-3.21677
Il10rb	-2.69221	-4.50334	-3.21675
Anxa2	-1.88764	-4.45022	-3.15077
Msn	-2.22804	-4.35768	-3.04494
Gpx2	-2.4756	-4.35013	-3.04031
Cyp4f39	-2.53749	-4.30369	-2.98993
Slc6a13	-2.16615	-4.30192	-2.98993
Plin2	-1.67103	-4.29159	-2.98978
Chmp2b	-1.91859	-4.27786	-2.97607
Herpud1	-3.00166	-4.26431	-2.95996
Wdr1	-1.82575	-4.20644	-2.89002
Mgl2	-1.79481	-4.19979	-2.88329
Dusp4	-1.98048	-4.17142	-2.85374
Rab17	-2.35182	-4.15183	-2.82884
Csta1	-1.98048	-4.07397	-2.73886
Serpinb9b	-1.94953	-4.03475	-2.69633
2610528J11Rik	-1.79481	-4.01758	-2.67758
Lgals4	-2.22804	-4.01003	-2.67142
Camk1	-2.10426	-4.00129	-2.66125
Asic3	-2.69221	-3.99253	-2.65178
Pgam2	-2.32087	-3.98992	-2.65178
Dpp3	-1.5163	-3.98457	-2.64638
Mycbpap	-2.19709	-3.97992	-2.64201
Fgfbp1	-2.35182	-3.97841	-2.64201
Lgals1	-4.17757	-3.9759	-2.64101
Elovl1	-1.64008	-3.93766	-2.59249
Dnmbp	-1.70197	-3.93247	-2.58721
Ugp2	-1.48536	-3.92856	-2.58375
4933402E13Rik	-2.32087	-3.91214	-2.56515
AI413582	-1.60914	-3.90756	-2.5621
Prss8	-2.44465	-3.90352	-2.55838
Erbb3	-1.82575	-3.89737	-2.55164
Ank	-2.04237	-3.88923	-2.54613
Mid1ip1	-2.41371	-3.87947	-2.53415
Abcc4	-2.10426	-3.85856	-2.50829
Mbnl2	-1.73292	-3.82212	-2.46744
Clic4	-1.39252	-3.82078	-2.46744
Srebf1	-1.98048	-3.80044	-2.44547
Hsp90b1	-1.48536	-3.7942	-2.44059
Cnn2	-2.01142	-3.78492	-2.43287
Nlrp4c	-1.91859	-3.76964	-2.41633
Cpne8	-1.94953	-3.75505	-2.3988
Necap2	-1.45441	-3.7428	-2.38539
Myo5b	-1.79481	-3.70831	-2.35028
Mapre2	-1.82575	-3.70682	-2.35028
Efemp1	-2.72316	-3.69519	-2.34036
Pitrm1	-1.45441	-3.68387	-2.32547
Cbs	-2.25898	-3.68041	-2.32215
Trim2	-2.38276	-3.67834	-2.32086
Myo1d	-1.70197	-3.66225	-2.30762
Plgrkt	-1.88764	-3.65202	-2.29425
Epn3	-2.66127	-3.64954	-2.2923
Capn2	-1.8567	-3.61849	-2.25485
Mapt	-1.48536	-3.61722	-2.25465
Hint2	-1.45441	-3.59832	-2.23498
Dkkl1	-1.73292	-3.58737	-2.22198
Fam107b	-1.67103	-3.58471	-2.22134
Litaf	-1.42347	-3.57725	-2.21232
Psap	-0.897405	-3.57646	-2.21232
Hoxd3	-2.1352	-3.55914	-2.1897
Gfpt2	-2.72316	-3.55713	-2.18833
Pdzk1ip1	-1.82575	-3.54687	-2.17466
Ppif	-1.57819	-3.54248	-2.17362
Ap2a1	-1.64008	-3.5423	-2.17362
Gm10046	-1.94953	-3.54191	-2.17362
Sdc4	-1.5163	-3.53616	-2.17217
Adh1	-5.87955	-3.53419	-2.17217
Gpx5	-3.21828	-3.5292	-2.16881
AU021092	-1.64008	-3.52206	-2.16267
Tpp1	-1.98048	-3.52201	-2.16267
Glo1	-1.36158	-3.51693	-2.16117
Pgap1	-1.76386	-3.50209	-2.14044
Ptgr1	-1.60914	-3.49826	-2.13621
Naga	-1.45441	-3.49652	-2.1357
Got1	-1.33063	-3.49496	-2.1357
Gata3	-1.88764	-3.49349	-2.1357
Ppp1r3b	-1.76386	-3.49291	-2.1357
Prss32	-2.07331	-3.49183	-2.13556
Elovl7	-1.54725	-3.45774	-2.09283
Sft2d2	-1.79481	-3.4559	-2.09178
Hmox1	-2.66127	-3.44219	-2.07836
Slc37a2	-2.38276	-3.4378	-2.07317
Rtn4ip1	-1.48536	-3.43471	-2.07151
Entpd1	-2.78505	-3.43466	-2.07151
Tdrp	-1.2378	-3.42976	-2.06817
Gnpat	-1.33063	-3.42151	-2.05995
Cxcl14	-2.4756	-3.41874	-2.05722
Clic3	-1.26874	-3.41623	-2.05722
Snx2	-1.20685	-3.41267	-2.05722
Tmem171	-1.70197	-3.41265	-2.05722
Tcta	-1.70197	-3.4093	-2.05722
Acp6	-1.39252	-3.40848	-2.05722
Dnajc3	-1.36158	-3.39411	-2.0392
Calr	-1.64008	-3.3897	-2.03386
Slc22a23	-1.98048	-3.36734	-2.01328
Atxn10	-1.42347	-3.33343	-1.97625
Ccdc42	-2.16615	-3.33275	-1.97625
Tac2	-2.69221	-3.32099	-1.96144
Cgrrf1	-1.70197	-3.31887	-1.96144

## Sheet: e32-cell ICM vs l32-cell ICM
early 32-cell ICM vs late 32-cell ICM
higher in early 32-cell ICM	fold change (log)	Z-score	corrected Z-score
Gata3	4.51797	6.18704	4.5393
Herpud1	3.9919	5.85033	4.22061
Cldn4	3.9919	5.83769	4.22061
Chac1	4.3323	5.10259	3.36296
Ptges	4.08474	4.93969	3.23873
Cdx2	3.55867	4.79578	3.11764
Tmem14c	3.03261	4.70856	3.03346
Atg16l2	2.93977	4.66152	2.97922
Amotl2	3.40395	4.60426	2.90878
Cdkn1a	4.20852	4.59463	2.90878
Impact	3.0945	4.5421	2.87282
Hyou1	2.97072	4.50545	2.8543
Rps18	3.00166	4.50007	2.8543
Sesn2	3.06355	4.36894	2.68819
Zfp219	2.69221	4.27382	2.56203
Slc38a2	3.24922	4.2135	2.50142
Khnyn	2.66127	4.2034	2.50142
Rcan1	2.87788	4.19617	2.50142
Cyb561	3.7134	4.18567	2.49871
Epb4.1l5	2.56843	4.17483	2.49199
Slc19a2	2.97072	4.06878	2.42599
Grhl2	2.72316	3.93823	2.26791
Mfsd7c	2.87788	3.93739	2.26791
Mlxipl	2.72316	3.93268	2.26626
Zfp53	3.21828	3.90438	2.24375
Lysmd3	2.53749	3.83374	2.15895
Flywch1	2.93977	3.8194	2.14454
Plk2	3.96096	3.8151	2.14272
Pnma5	2.56843	3.80004	2.12483
Vps37c	2.41371	3.79709	2.12483
Zfp296	2.50654	3.79472	2.12483
Slc5a6	2.53749	3.76473	2.0933
Sh3d21	2.56843	3.76331	2.0933
Ficd	2.7541	3.76039	2.0933
Ormdl3	2.38276	3.75369	2.08864
Podxl2	3.18733	3.72876	2.0738
Ccng1	2.38276	3.69839	2.03973
Mfsd12	2.72316	3.69586	2.03973
Taf1c	2.41371	3.6874	2.03215
Tmem125	3.43489	3.66455	2.01535
Ripk4	3.0945	3.64717	1.99882
Ddit3	2.63032	3.64214	1.9945
Gstp1	2.56843	3.63677	1.99345
higher in late 32-cell ICM	fold change (log)	Z-score	corrected Z-score
Malat1	-3.65151	-6.34616	-4.60804
Klf4	-3.15639	-5.69222	-4.07417
Trim28	-2.72316	-5.15955	-3.36709
Lars2	-2.78505	-5.12848	-3.36396
Marcks	-3.12544	-5.0024	-3.26639
Gm13102	-3.86812	-4.99395	-3.26639
Satb1	-2.81599	-4.94926	-3.23873
Larp1	-2.56843	-4.87089	-3.19653
Ybx3	-2.97072	-4.86894	-3.19653
Hnrnpd	-2.53749	-4.86699	-3.19653
Gspt1	-2.59938	-4.77809	-3.11764
Rcc2	-2.59938	-4.77668	-3.11764
Kcmf1	-2.41371	-4.56855	-2.88445
Hnrnpab	-2.32087	-4.56019	-2.88445
Kmt2c	-2.59938	-4.5296	-2.87282
Eif3b	-2.50654	-4.52761	-2.87282
Rnf130	-2.97072	-4.48298	-2.83955
Gata6	-2.78505	-4.39313	-2.71455
Reps1	-2.53749	-4.30276	-2.59671
Dnajc21	-2.35182	-4.21818	-2.50142
H2-D1	-2.4756	-4.20745	-2.50142
Hmga2	-2.32087	-4.20368	-2.50142
Znrf2	-2.38276	-4.19288	-2.50142
Hnrnpu	-2.32087	-4.17079	-2.49199
Cul3	-2.35182	-4.14989	-2.4752
Diap2	-2.7541	-4.14739	-2.4752
Rad21	-2.25898	-4.14494	-2.4752
Suz12	-2.22804	-4.1391	-2.47362
Tmsb4x	-4.3323	-4.12384	-2.46888
Pcbp2	-2.28993	-4.12342	-2.46888
Spag9	-2.41371	-4.12211	-2.46888
Egln1	-2.35182	-4.11114	-2.46333
Pygl	-2.4756	-4.10967	-2.46333
LOC101056043	-2.28993	-4.08903	-2.44295
Yy1	-2.56843	-4.08393	-2.44295
Luc7l2	-2.19709	-4.0838	-2.44295
Ube2q1	-2.32087	-4.05814	-2.41574
H2-K2	-2.32087	-4.03669	-2.38848
Rbm33	-2.28993	-4.01007	-2.35289
Rbm25	-2.07331	-3.9794	-2.31061
Csnk1g2	-2.28993	-3.9489	-2.27143
H2afy	-2.07331	-3.94709	-2.27143
Setd8	-2.16615	-3.92867	-2.26563
Srsf1	-2.16615	-3.91828	-2.25476
Fn1	-2.69221	-3.90516	-2.24375
Senp6	-2.32087	-3.89706	-2.23754
Cmip	-2.41371	-3.88269	-2.21999
Psme3	-2.1352	-3.87066	-2.20609
Hsp90aa1	-1.91859	-3.83825	-2.15923
Enah	-2.10426	-3.83152	-2.15895
Dgkz	-2.16615	-3.79084	-2.12349
Eif2s2	-1.8567	-3.77151	-2.09697
Snx27	-2.25898	-3.75177	-2.08864
Ccz1	-2.04237	-3.74726	-2.08591
Kdm1a	-2.10426	-3.73592	-2.07677
Pabpc1	-1.91859	-3.73358	-2.07677
C77370	-2.63032	-3.73331	-2.07677
Rtn4	-2.04237	-3.72127	-2.06601
Eif4ebp3	-2.41371	-3.71854	-2.06591
Hdac2	-1.94953	-3.69461	-2.03973
Crebbp	-2.04237	-3.68455	-2.03168
Ybx1	-1.98048	-3.66733	-2.01535
Ctdnep1	-2.25898	-3.66686	-2.01535
Plod2	-2.78505	-3.66511	-2.01535
Ythdf1	-1.91859	-3.66141	-2.01421
Pdpn	-2.84694	-3.65448	-2.00685
Map4k4	-2.16615	-3.6386	-1.99345
Hdgf	-1.94953	-3.62746	-1.98293
Trim24	-2.56843	-3.62571	-1.98293

## Sheet: e32-cell TE vs l32-cell TE
ealry 32-cell TE vs late 32-cell TE
higher in early 32-cell TE	fold change (log)	Z-score	corrected Z-score
Rhbdd1	2.35182	4.14905	1.98372
higher in late 32-cell TE	fold change (log)	Z-score	corrected Z-score
AA467197	-3.83718	-5.49097	-3.54689
Crip1	-3.18733	-5.4808	-3.54689
Lars2	-2.66127	-5.14608	-3.15003
Cyr61	-3.24922	-5.01285	-3.05923
Fmnl2	-2.69221	-4.99039	-3.05923
Malat1	-2.93977	-4.94446	-3.04288
Ncor1	-2.32087	-4.67152	-2.65784
Hnrnpd	-2.25898	-4.48062	-2.38391
Zbtb10	-2.63032	-4.43916	-2.3631
H2afy	-2.04237	-4.42061	-2.3631
Egln1	-2.38276	-4.35899	-2.29259
Marcks	-2.25898	-4.25952	-2.15153

## Sheet: l32-cell ICM vs 64-cell ICM
late 32-cell ICM vs 64-cell ICM
higher in late 32-cell ICM	fold change (log)	Z-score	corrected Z-score
Pemt	4.39419	6.14745	4.48624
Trim43b	4.67269	5.33373	3.57195
Trim43a	3.49678	4.71208	2.77792
Becn2	3.34206	4.58202	2.66458
Socs3	3.46584	4.31802	2.3314
Exoc3l4	4.05379	4.31342	2.3314
Fam46c	2.84694	4.23736	2.23238
Baiap2	3.24922	4.16626	2.1485
Ppt2	2.81599	4.11217	2.09596
Satb1	2.69221	4.09468	2.08502
higher in 64-cell ICM	fold change (log)	Z-score	corrected Z-score
Spp1	-6.93168	-7.13655	-5.63387
Il6st	-4.3323	-5.4788	-3.71844
Lifr	-4.23946	-5.47583	-3.71844
Sox17	-4.67269	-4.97781	-3.09419
Aqp8	-4.70364	-4.79684	-2.85974
BC053393	-3.373	-4.67822	-2.77792
Akr1c21	-4.05379	-4.6728	-2.77792
Fam25c	-4.3323	-4.55667	-2.65314
Rps18	-3.21828	-4.37536	-2.38303
Sparc	-3.43489	-4.22754	-2.23238
Cyb561	-4.05379	-4.1269	-2.1011
Upp1	-2.69221	-4.08183	-2.0814

## Sheet: l32-cell TE vs 64-cell TE
late 32-cell TE vs 64-cell TE
higher in late 32-cell TE	fold change (log)	Z-score	corrected Z-score
Fam46c	5.50821	7.14406	5.76139
Pemt	4.14663	5.96845	4.44424
Pdxk	4.27041	5.55592	3.95176
Gm11517	3.96096	5.52567	3.95176
Tceb1	3.40395	5.52101	3.95176
Timm10	2.93977	4.89606	3.19778
Alppl2	2.90883	4.78589	3.05657
Trim43b	4.36324	4.67871	2.95499
Cited1	2.97072	4.59031	2.83887
Gulo	3.77529	4.50014	2.72673
Pla2g7	3.83718	4.42219	2.63301
Fbxo15	2.72316	4.32502	2.53535
Sssca1	2.59938	4.20699	2.38631
Rragd	2.72316	4.18673	2.36626
Stmn3	2.87788	4.17359	2.35741
Bcas3	2.53749	4.10469	2.28029
Klhl10	3.83718	4.07997	2.25088
1700018B24Rik	3.21828	4.03507	2.19843
Pmm1	2.50654	3.98809	2.14098
2310040G24Rik	2.81599	3.97781	2.13407
Cul5	2.4756	3.8823	1.98606
Tfrc	2.44465	3.875	1.98606
Rcl1	2.38276	3.87353	1.98606
higher in 64-cell TE	fold change (log)	Z-score	corrected Z-score
Adh1	-7.48869	-7.14466	-5.76139
BC053393	-5.07498	-6.6464	-5.21447
Lgals1	-4.57986	-6.24877	-4.76331
Capg	-3.21828	-5.16533	-3.4856
Fam213b	-3.373	-5.03552	-3.32713
Lcp1	-3.373	-4.89846	-3.19778
Anxa6	-3.65151	-4.89819	-3.19778
Gbas	-2.93977	-4.74927	-3.02261
Slc30a2	-3.74434	-4.73229	-3.01678
Ugdh	-3.00166	-4.49528	-2.72673
Mt2	-3.03261	-4.41477	-2.63301
E330020D12Rik	-2.97072	-4.33672	-2.53541
Aldh3b2	-3.00166	-4.33404	-2.53541
Abhd14b	-3.06355	-4.30364	-2.51514
Slc29a1	-2.72316	-4.21007	-2.38631
Gm1821.uid_19772	-2.38276	-4.16448	-2.35474
Sdc4	-1.67103	-4.11342	-2.28298
Tubb5	-2.44465	-4.04331	-2.20114
Enpp1	-2.7541	-4.01192	-2.17046
Tmem106a	-3.00166	-3.85038	-1.95571
