# Supplementary figures and images for: Position- and Hippo signaling-dependent plasticity during lineage segregation in the early mouse embryo
Source: eLife journal article supplement (doi:10.7554/elife.22906), 2017-02-22

Figure 1 - figure supplement 1

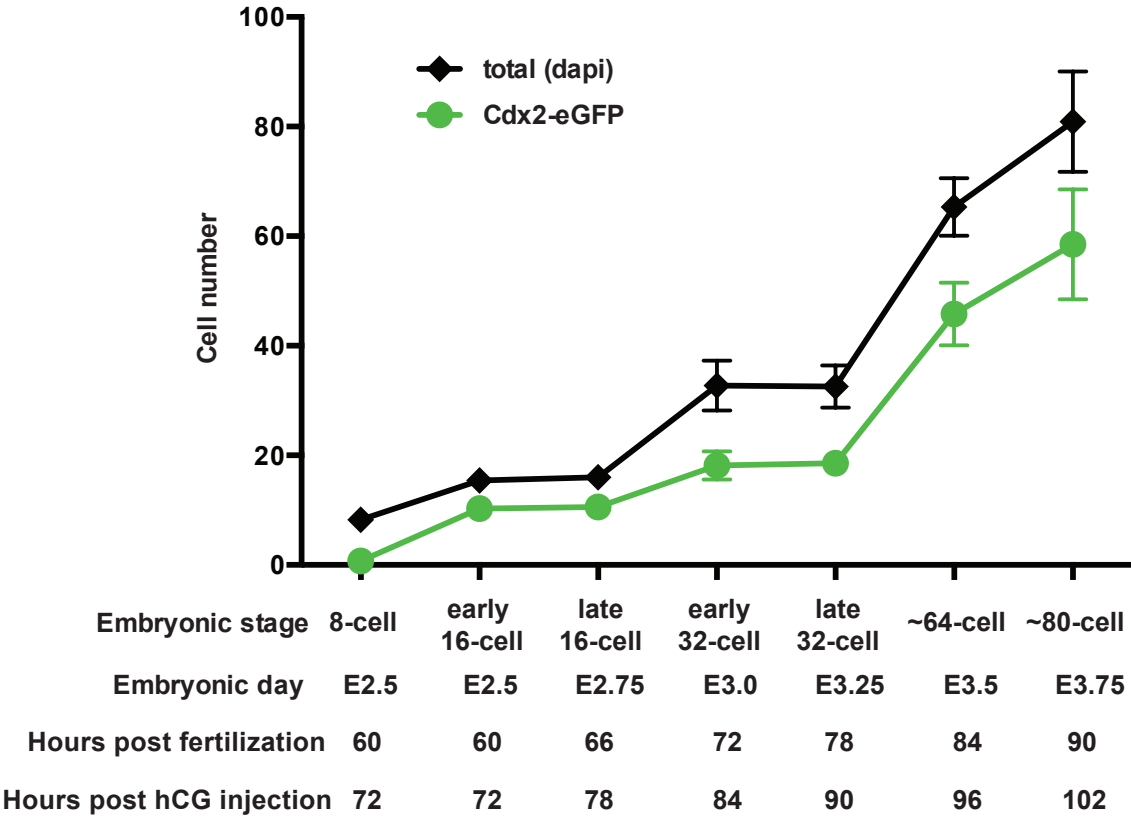

Supplement: supp [file elife-22906-supp-v1.zip]

Figure 3 - figure supplement 2

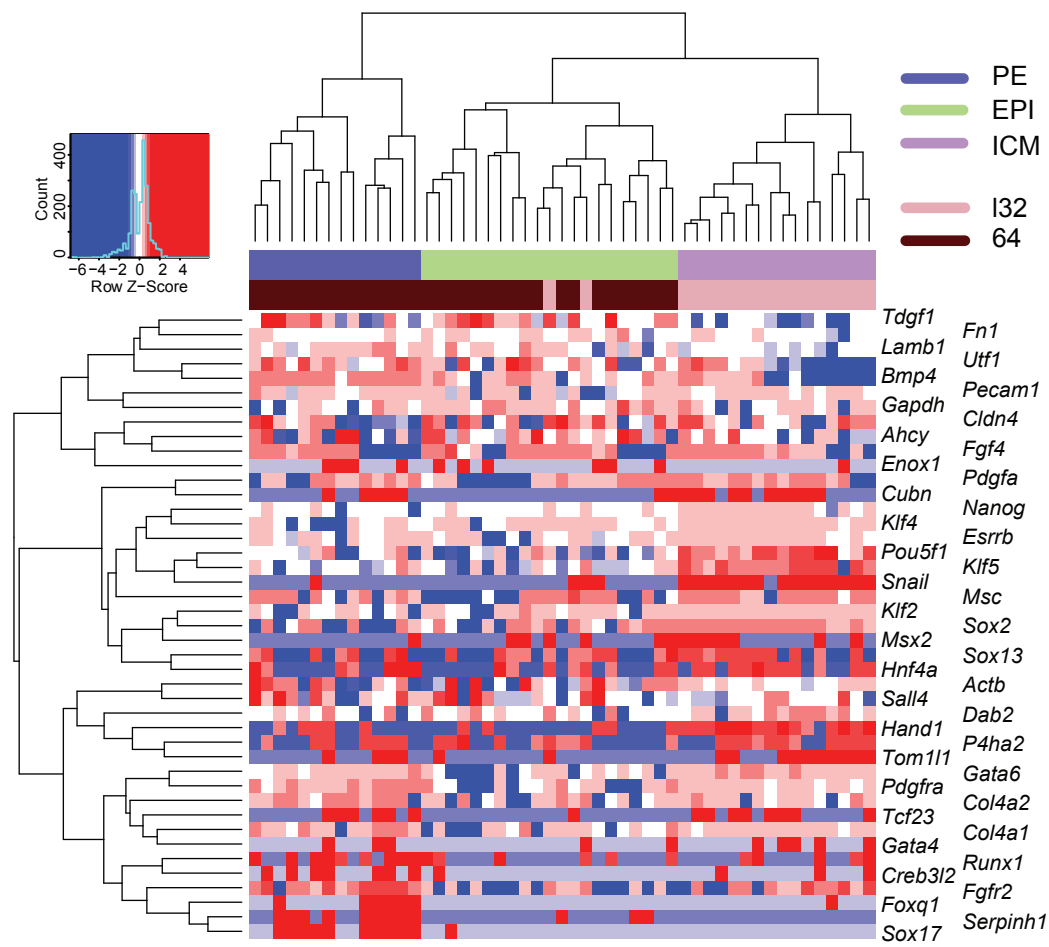

Supplement: supp [file elife-22906-supp-v1.zip › elife_poa_e22906_Figure_3_Figure_Supplement_2.pdf]

Figure 4 – figure supplement 1

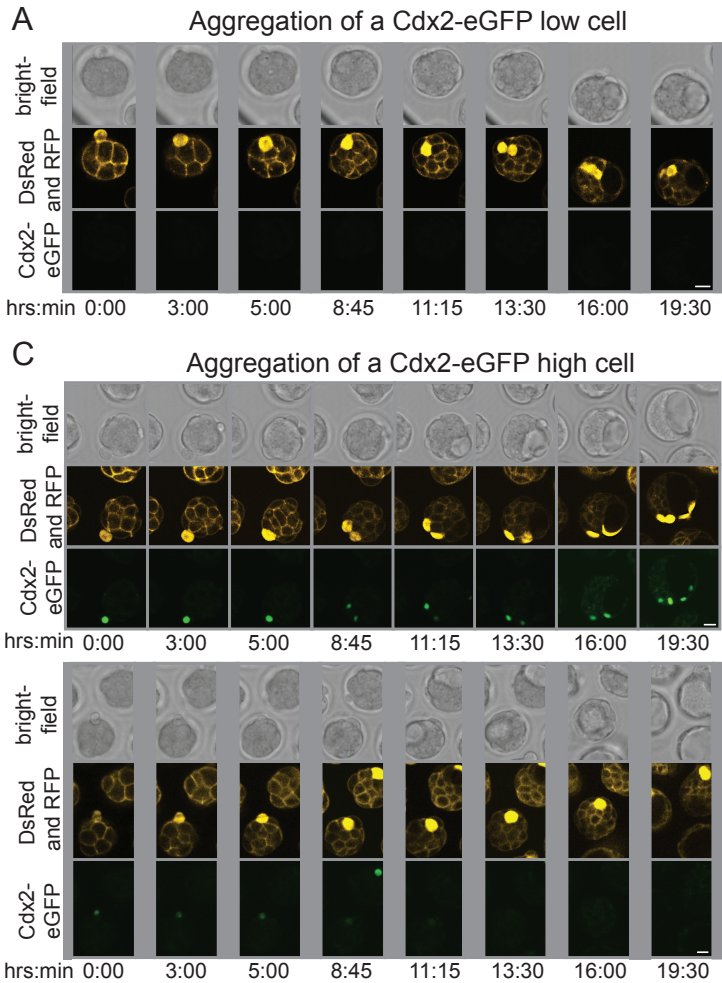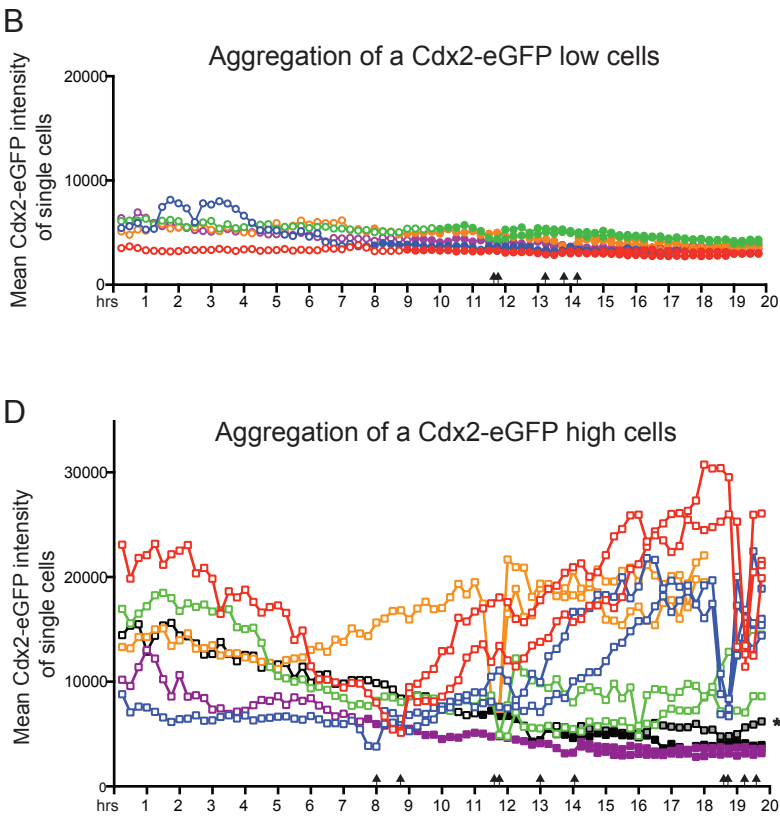

Supplement: supp [file elife-22906-supp-v1.zip › elife_poa_e22906_Figure_4_Figure_Supplement_1.pdf]

Figure 6 – figure supplement 2

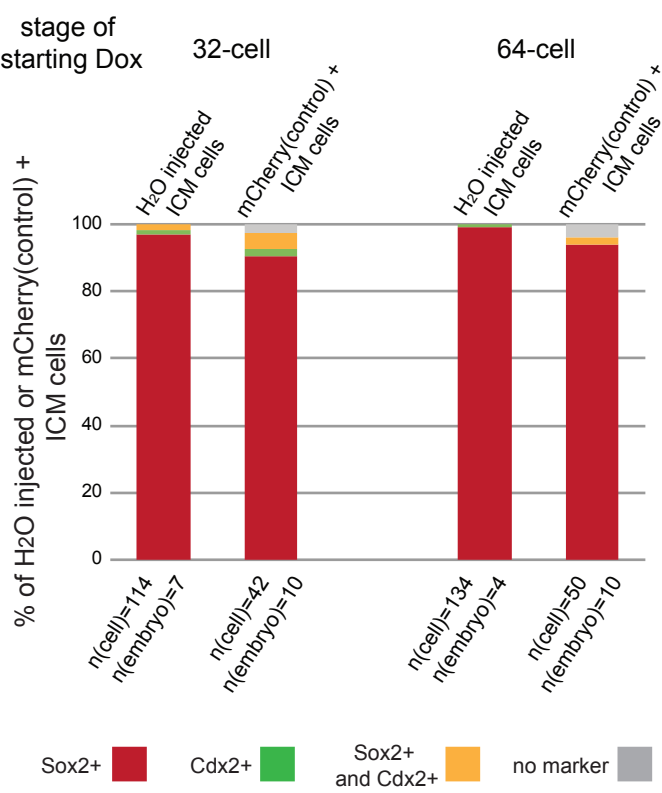

Supplement: supp [file elife-22906-supp-v1.zip › elife_poa_e22906_Figure_6_Figure_Supplement_2.pdf]

Figure 6 – figure supplement 1

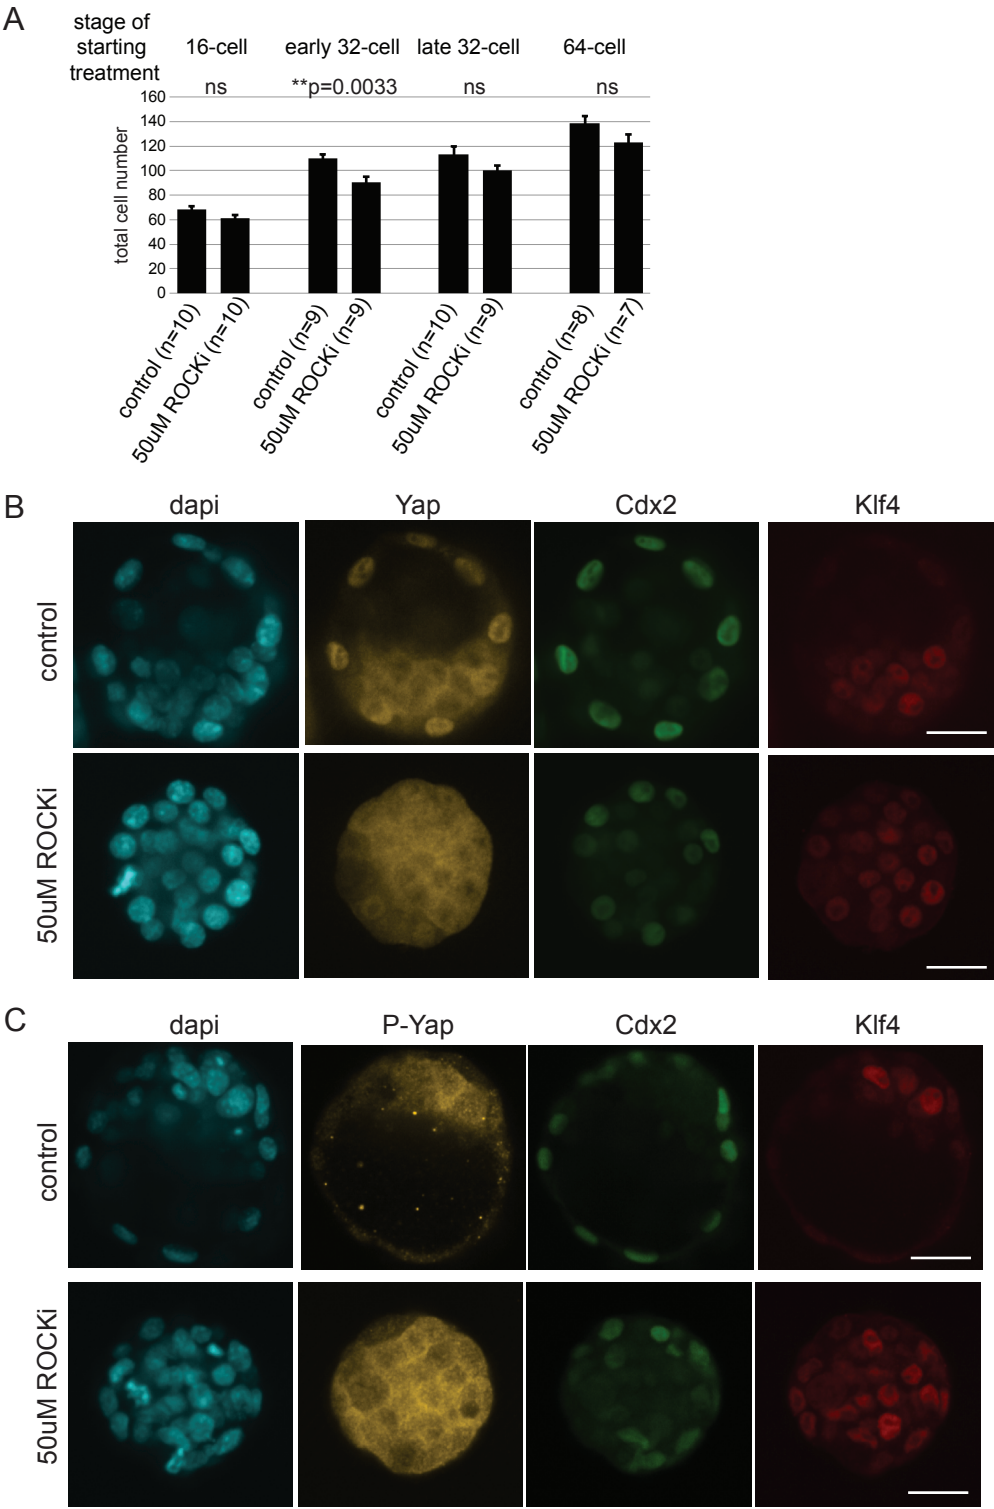

Supplement: supp [file elife-22906-supp-v1.zip › elife_poa_e22906_Figure_6_Figure_Supplement_1.pdf]

Figure 5 – figure supplement 1

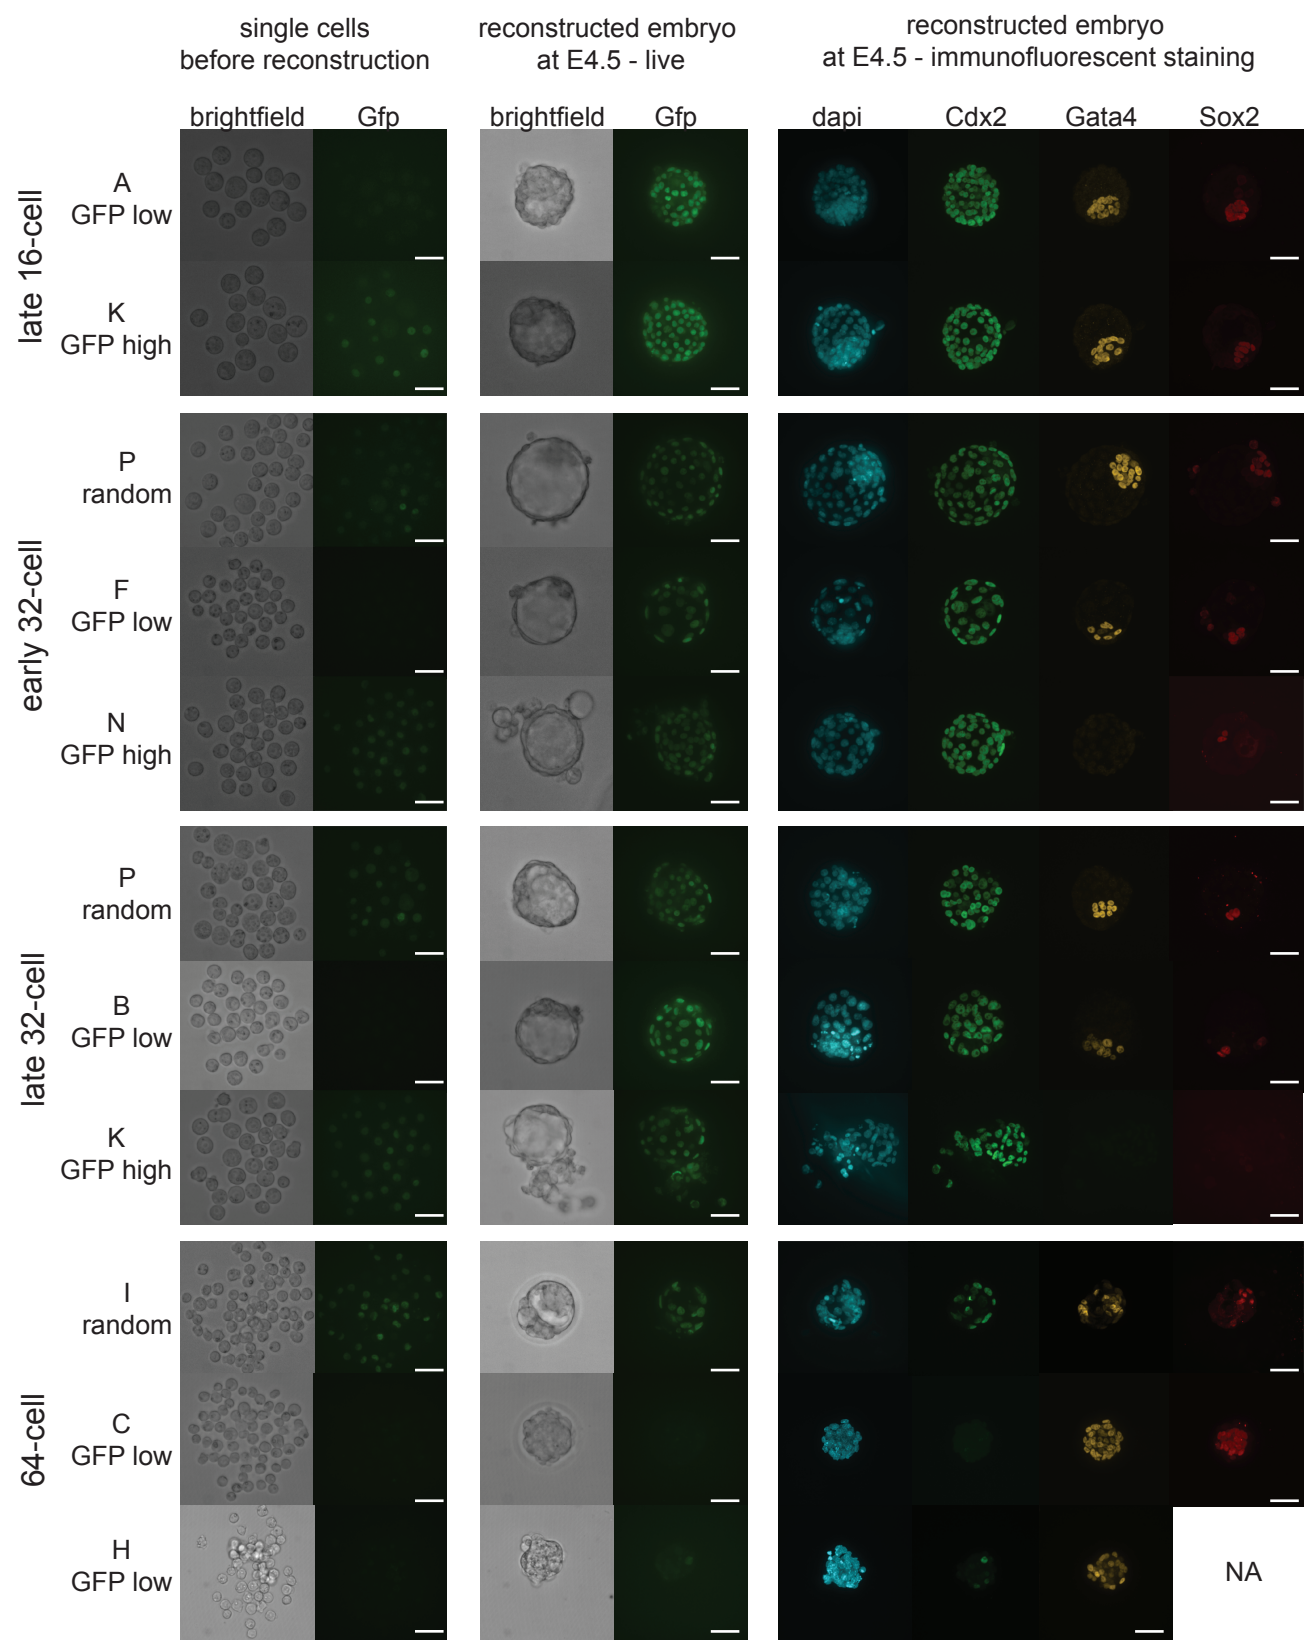

Supplement: supp [file elife-22906-supp-v1.zip › elife_poa_e22906_Figure_5_Figure_Supplement_1.pdf]

Figure 3 – figure supplement 1

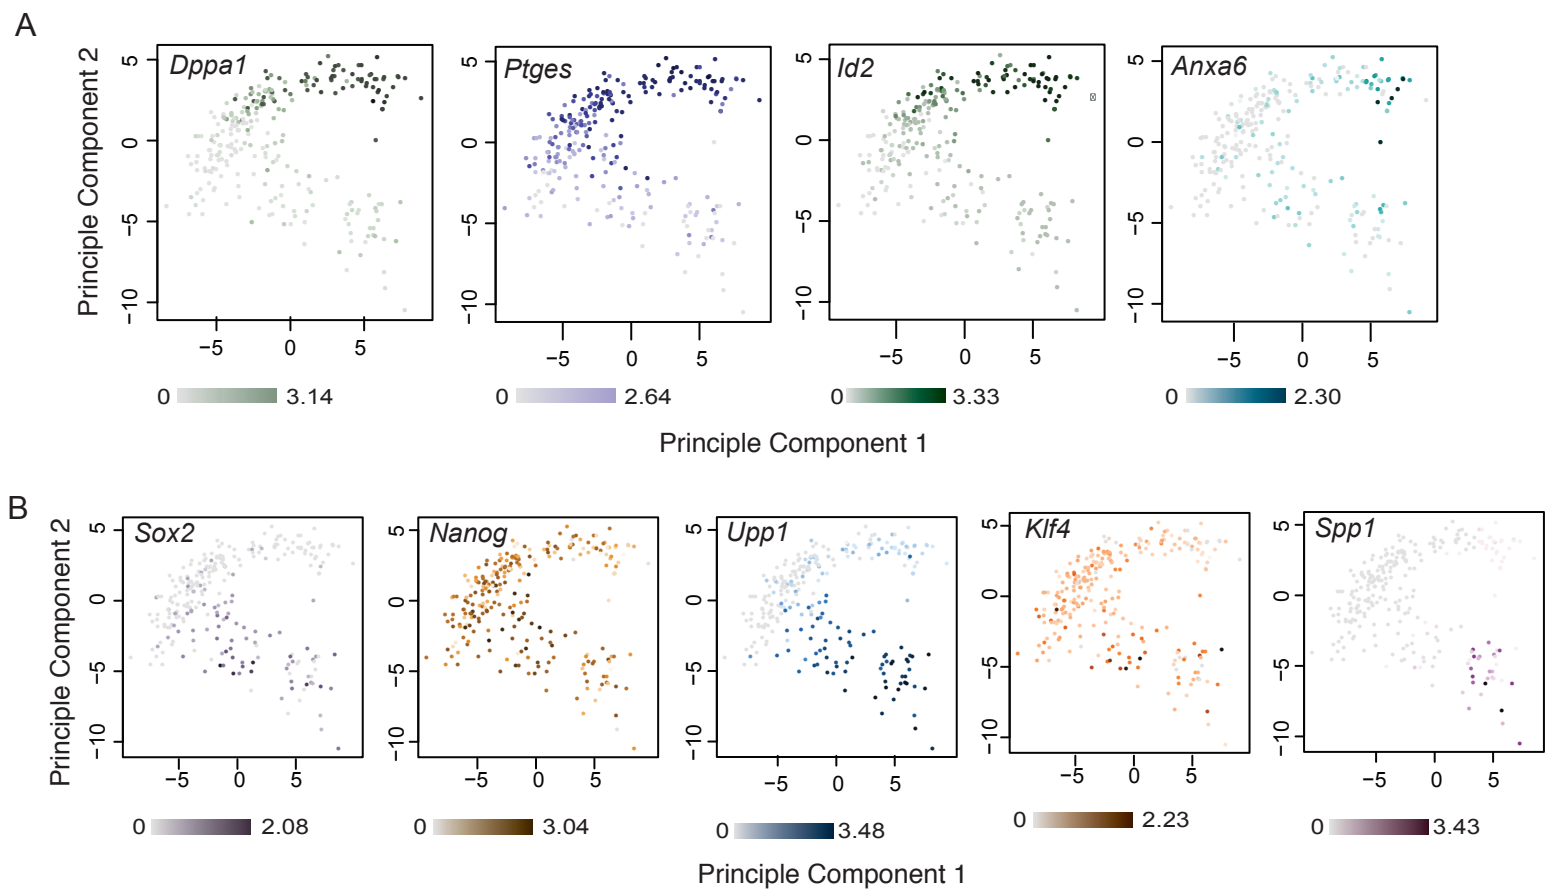

Supplement: supp [file elife-22906-supp-v1.zip › elife_poa_e22906_Figure_3_Figure_Supplement_1.pdf]
